1 **Profiling the effects of rifaximin on the healthy human colonic microbiota using a**  
2 **chemostat model**

3

4 Ines B. Moura<sup>a#</sup>, Anthony M. Buckley<sup>a</sup>, Duncan Ewin<sup>a</sup>, Emma Clark<sup>a</sup>, Suparna Mitra<sup>a</sup>, Mark  
5 H. Wilcox<sup>a,b</sup>, Caroline H. Chilton<sup>a</sup>

6

7 <sup>a</sup>Leeds Institute of Medical Research, Faculty of Medicine and Health, University of Leeds,  
8 Leeds, UK;

9 <sup>b</sup>Department of Microbiology, Leeds Teaching Hospitals NHS Trust, The General Infirmary,  
10 Leeds, UK

11

12 Keywords: Rifaximin, gut microbiota, chemostat model, 16S rRNA sequencing

13

14 # Corresponding Author: Dr Ines Moura

15 Healthcare Associated Infection Research Group

16 Leeds Institute of Medical Research

17 University of Leeds

18 Microbiology, Old Medical School

19 Leeds General Infirmary

20 Leeds LS1 3EX, UK

21 Tel +44 113 392 8663

22 Email: [i.b.moura@leeds.ac.uk](mailto:i.b.moura@leeds.ac.uk)

23

24

25

26 **Abstract**

27

28 Rifaximin is a low solubility antibiotic with activity against a wide range of bacterial  
29 pathogens. It accumulates in the intestine and is suitable for prolonged use. Three chemostat  
30 models (A, B and C) were used to investigate the effects of three rifaximin formulations ( $\alpha$ ,  $\beta$   
31 and  $\kappa$ , respectively) on the gut microbiome. Bacterial populations were monitored by  
32 bacterial culture and 16S rRNA gene amplicon (16S) sequencing. Limited disruption of  
33 bacterial populations was observed for rifaximin  $\alpha$ ,  $\beta$  and  $\kappa$ . All formulations caused declines  
34 in total spores ( $\sim 2 \log_{10}$  cfu ml<sup>-1</sup>), *Enterococcus* spp. ( $\sim 2 \log_{10}$  cfu ml<sup>-1</sup> in models A and C,  
35 and  $\sim 1 \log_{10}$  cfu ml<sup>-1</sup> in model B), and *Bacteroides* spp. populations ( $\sim 3 \log_{10}$  cfu ml<sup>-1</sup> in  
36 models A and C, and  $\sim 4 \log_{10}$  cfu ml<sup>-1</sup> in model B). Bacterial populations fully recovered  
37 during antibiotic dosing in model C, and before the end of the experiment in models A and B.  
38 According to the taxonomic analysis, prior to rifaximin exposure, Bifidobacteriaceae,  
39 Ruminococcaceae, Acidaminococcaceae, Lachnospiraceae and Rikenellaceae families  
40 represented >92% of the total relative abundance, in all models. Within these families, 15  
41 bacterial genera represented >99% of the overall relative abundance. Overall, the 16S  
42 sequencing and culture data showed similar variations in the bacterial populations studied.  
43 Among the three formulations, rifaximin  $\kappa$  appeared to have the least disruptive effect on the  
44 colonic microbiota, with culture populations showing recovery in a shorter period and the  
45 taxonomic analysis revealing the least global variation in relative abundance of prevalent  
46 groups.

## 47 **Introduction**

48 Rifaximin is an oral antibiotic with low solubility and *in vitro* bactericidal activity reported  
49 against a wide range of facultative and obligate aerobes such as, *Escherichia coli*,  
50 *Clostridioides difficile*, *Staphylococcus* spp., and *Streptococcus* spp., among others [1-3]. Its  
51 chemical structure is a derivative of rifamycin and contains a supplementary pyridoimidazole  
52 ring that limits the absorption of the drug in the intestine [3]. Rifaximin is considered suitable  
53 for prolonged use due to its poor solubility and subsequent low systemic side effects [2, 4]. It  
54 is FDA approved for the treatment of traveller's diarrhoea and irritable bowel syndrome  
55 (IBS), and has been shown effective in clinical trials as therapeutic agent in small bowel  
56 bacterial overgrowth, inflammatory bowel disease and in *C. difficile* infection [2, 4-8].  
57 Rifaximin is also used to reduce the risk of hepatic encephalopathy in patients with impaired  
58 liver function and portosystemic shunting [9].  
59 A decline in colonic bacterial diversity has been reported during rifaximin use, [10-12] with  
60 bacterial populations recovering following antibiotic treatment. However, studies have  
61 mostly investigated variations in faecal samples from particular patient groups with  
62 gastrointestinal or immune diseases [10, 12-14], who may already have a depleted gut  
63 microbiota, therefore giving only a partial insight into the effects of rifaximin on the gut  
64 microbiome. Sampling during *in vivo* studies is usually done via faecal microbiota profiling  
65 which limits the time points available for analysis and does not always reflect disruptive  
66 effects in the colon and, providing only partial data on the antibiotic effects in the intestinal  
67 microbiome. A continuous *in vitro* model of the human colon has been used before to  
68 investigate rifaximin effects in microbiota representative of Crohn's disease, [15] but sample  
69 collection was also limited to pre- and post-antibiotic dosing periods. Understanding the  
70 differences in microbiota disruption in healthy and diseased states is of key importance,  
71 particularly for antibiotics of prolonged use.

72 The chemostat gut model used in this study is a clinically reflective representation of the  
73 bacterial composition and activities of the human colon, and has been validated against gut  
74 contents of sudden death victims [16]. Due to the low solubility of rifaximin, high  
75 concentrations can be achieved in the colon, which makes this model ideal to test the  
76 disruptive effects of rifaximin on the microbiota [17]. The gut model has a proven track  
77 record in assessing drug efficacy during pre-clinical and clinical drug development stages. It  
78 has been shown to be particularly predictive as an *in vitro* model of *C. difficile* infection  
79 (CDI) to evaluate drug propensity to induce CDI, [18-21] with the data correlating well with  
80 *in vivo* and clinical trial results [22, 23].

81 In this study, we used the *in vitro* gut model to investigate the changes in the human healthy  
82 intestinal microbiota following instillation of three proprietary rifaximin formulations.  
83 Bacterial culture analysis and microbial diversity analysis by 16S rRNA gene amplicon (16S)  
84 sequencing were performed to evaluate gut microbiota populations depletion and recovery.

## 85 **Materials and Methods**

86

### 87 ***In vitro* gut model and experimental design**

88 Three triple-stage chemostat models were assembled as previously described [18, 24], and  
89 run in parallel. Briefly, each model consisted of three glass vessels maintained at 37°C and  
90 arranged in a weir cascade. Each vessel represents the conditions of the human colon, from  
91 proximal to distal, in pH and nutrient availability. The models were continuously fed with  
92 complex growth media [18] connected to vessel 1 at a pre-established rate of 0.015h<sup>-1</sup> and an  
93 anaerobic environment was maintained by sparging the system with nitrogen. Sample ports in  
94 all vessels allowed sample collection for monitoring of microbiota populations and antibiotic  
95 instillation. All models were initiated with a slurry of pooled human faeces from healthy  
96 volunteers (n=4) with no history of antibiotic therapy in the previous 6 months, diluted in  
97 pre-reduced phosphate-buffered saline (PBS) (10% w/v). Bacterial populations were allowed  
98 to equilibrate for 2 weeks (equilibration period) prior to antibiotic exposure (rifaximin dosing  
99 period), and to recover for 3 weeks post antibiotic dosing (recovery period), as outlined in  
100 Fig. 1. Three proprietary rifaximin formulations, named in this study as alpha- $\alpha$ , beta- $\beta$ , and  
101 kappa- $\kappa$  (supplied by Teva Pharmaceuticals USA, Parsippany, NJ, USA) were investigated.  
102 Model A was inoculated with rifaximin  $\alpha$ , model B was inoculated with rifaximin  $\beta$  and  
103 model C was inoculated with rifaximin  $\kappa$ . Only one model was used per formulation, as the  
104 reproducibility and clinically reflective nature of this system has been shown [16, 21, 23-25].  
105 Due to rifaximin poor solubility, each antibiotic dose was suspended in water and added to  
106 vessel 1 of the respective model. Each model was dosed with 400 mg of rifaximin, thrice  
107 daily, for 10 days, to replicate the dosing regimen previously used in human clinical trials [4],  
108 and the rifaximin concentration that reaches the human colon. No adjustments to the dosing  
109 concentration were performed based on the gut model vessel volumes, since the oral

110 administration of a single radiolabelled dose of 400 mg of rifaximin to healthy individuals  
111 showed that nearly all rifaximin (~97%) is excreted in the faeces [2]. Selective and non-  
112 selective agars (Table 1) were used for culture profiling of total facultative and obligate  
113 anaerobes, Enterobacteriaceae, *Enterococcus* spp., *Bifidobacterium* spp., *Bacteroides* spp.,  
114 *Lactobacillus* spp., *Clostridium* spp., and total spores, as previously described [18], supported  
115 by MALDI-TOF for specific colony/species identification. Bacterial populations in vessel 3  
116 were monitored by inoculating the agar plates in triplicate every other day prior to antibiotic  
117 exposure and daily thereafter. The limit of detection for culture assay was established at  
118  $\sim 1.22 \log_{10} \text{ cfu ml}^{-1}$ . Additional samples were taken from vessel 3 of each model to  
119 investigate bacterial diversity by 16S sequencing as outlined in Fig. 1. Vessel 3 was  
120 particularly investigated due to its microbial richness and representation of the human colon  
121 region more physiologically relevant for opportunistic infections [16, 18, 24].

122

### 123 **16S rRNA gene amplification and library preparation**

124 DNA extraction from gut model fluid was performed using the QIAamp DNA Stool Kit with  
125 Pathogen Lysis tubes (Qiagen). Samples were pelleted and the supernatant. Protocol was  
126 performed according to the manufacturer's instructions except: a sterile glass bead was added  
127 to the lysis tube, homogenisation was performed at 6500 rpm 2x20s using Precellys 24  
128 (Bertin Instruments), and sample clean-up was improved with 20  $\mu\text{g}$  of RNase (Thermo  
129 Fisher Scientific). PCR of the variable 4 region (F-5'-AYTGGGYDTAAAGNG-3', R-5'-  
130 TACNVGGGTATCTAATCC-3'), [26] was performed in a 50  $\mu\text{L}$  reaction volume  
131 consisting of 40 ng/ $\mu\text{L}$  template DNA, 1x Q5 Hot Start High-Fidelity Master Mix (Qiagen),  
132 and 25  $\mu\text{M}$  of each primer. Thermal cycler conditions were as follows: denaturing at 98°C for  
133 30s, 30 annealing cycles of 98°C for 5s, 42°C for 10s, 72°C for 20s, and elongation at 72°C  
134 for 2 min. Successful amplification was confirmed by gel electrophoresis before samples

135 were cleaned using the MinElute PCR Purification kit (Qiagen). PCR products were  
136 quantified and ~80 ng of dsDNA was carried forward to library preparation using the  
137 NEBNext Ultra DNA Library Prep Kit for Illumina and NEBNext Multiplex Oligos for  
138 Illumina (New England Biolabs). Following twelve cycles of PCR enrichment, the libraries  
139 were cleaned with AMPure Beads (Beckman Coulter), and quality was confirmed by DNA  
140 screen tapes (TapeStation, Agilent). Successful libraries were pooled and pair-end sequenced  
141 on an Illumina MiSeq platform (2 × 250 bp).

142

### 143 **Bioinformatics analysis and bacterial identification**

144 Sequencing analysis was performed as previously described [27]. Briefly, de-multiplexed  
145 FASTQ files were trimmed of adapter sequences using cutadapt [28]. Paired reads were  
146 merged using fastq-join [29] under default settings and then converted to FASTA format.  
147 Consensus sequences were removed when containing ambiguous base calls, two contiguous  
148 bases with a PHRED quality score lower than 33 or a length more than 2 bp different from  
149 the expected length of 240 bp. Further analysis was performed using QIIME [30].  
150 Operational taxonomy units (OTUs) were selected using Usearch [31], and aligned with  
151 PyNAST using the Greengenes reference database [32]. Taxonomy was assigned using the  
152 RDP 2.2 classifier [33]. The files resulting from the above analyses were imported in the  
153 Metagenome ANalyzer (MEGAN) for detailed group specific analyses, annotations and plots  
154 [34].

155

### 156 **Antimicrobial assay**

157 Bioactive rifaximin concentrations were measured daily during and post antibiotic  
158 instillation. Aliquots were collected daily from each vessel of model A, B and C and kept at -  
159 80°C until processing. Due to the low solubility of rifaximin, the concentrations of both the

160 solubilised fraction and the concentrations of the antibiotic that remained as suspension in the  
161 vessels were measured. Following centrifugation for 10 min at 15,000g, supernatants were  
162 removed and 1 ml of methanol was added to each pellet to dissolve any antibiotic powder. An  
163 additional centrifugation step was performed to remove cell debris. Concentrations of  
164 rifaximin were determined using Wilkins Chalgren agar with *Staphylococcus aureus* as the  
165 indicator organism. Assays were performed as previously described [21] in triplicate to assess  
166 the concentrations of solubilised antibiotic (supernatants) and the concentrations of antibiotic  
167 that remained in suspension (methanol-solubilised powder) in each vessel. The limit of  
168 detection for this assay was established at 8 mg l<sup>-1</sup>.

169

170

171

172

173

174

175

176

177

178

179

180

181

182

183

184



185 **Results**

186

187 **Effects of rifaximin  $\alpha$ ,  $\beta$  and  $\kappa$  on the gut microbiota populations**

188 Three chemostat models (A,B and C) were run in parallel to investigate the effects of three  
189 rifaximin formulations ( $\alpha$ ,  $\beta$  and  $\kappa$ ) on the gut microbiota. All models were started with the  
190 same slurry and were left without intervention for 14 days to allow bacterial populations to  
191 equilibrate. Results for vessel 3 only are shown, as this vessel represents the distal colon, a  
192 region of high bacterial diversity and biologically relevant for intestinal diseases associated  
193 with disruption of the normal gut microbiota (e.g. CDI) [24]. In all models, microbiota  
194 populations were stable prior to antibiotic exposure (Fig. 2 and Fig. S1). Rifaximin  $\alpha$   
195 exposure caused a declines in in *Bifidobacterium* spp. and total spores ( $\sim 1.5 \log_{10}$  cfu ml<sup>-1</sup>), in  
196 *Enterococcus* spp. ( $\sim 2 \log_{10}$  cfu ml<sup>-1</sup>), in *Bacteroides* spp. ( $\sim 3 \log_{10}$  cfu ml<sup>-1</sup>) and, in  
197 *Clostridium* spp. ( $\sim 1 \log_{10}$  cfu ml<sup>-1</sup>) populations (Fig. 2a and Fig. S1a). Total spores,  
198 *Bifidobacterium* spp. and *Bacteroides* spp. populations recovered during antibiotic instillation  
199 period. *Enterococcus* spp. recovered to pre-antibiotic levels by the end of the experiment..  
200 Following rifaximin  $\alpha$  instillation, *Clostridium* spp. populations remained at  $\sim 6 \log_{10}$  cfu ml<sup>-1</sup>  
201 throughout the experiment (Fig. S1a).

202 In model B, effects of exposure to rifaximin  $\beta$  were similar to those of rifaximin  $\alpha$  (Fig. 2b  
203 and Fig. S1b). Declines were observed in *Enterococcus* spp. ( $\sim 1 \log_{10}$  cfu ml<sup>-1</sup>), total spores  
204 ( $\sim 2 \log_{10}$  cfu ml<sup>-1</sup>), *Bacteroides* spp. populations ( $\sim 4 \log_{10}$  cfu ml<sup>-1</sup>), and *Clostridium* spp. ( $\sim 1$   
205  $\log_{10}$  cfu ml<sup>-1</sup>). *Enterococcus* spp. populations recovered 4 days post antibiotic dosing and  
206 showed a further  $\sim 1 \log_{10}$  cfu ml<sup>-1</sup> increase 11 days post cessation of antibiotic instillation.  
207 Total spores recovered to equilibration period levels ( $\sim 4 \log_{10}$  cfu ml<sup>-1</sup>) approximately 4 days  
208 post completion of antibiotic dosing. *Bacteroides* spp. and *Clostridium* spp. populations  
209 recovered during rifaximin instillation. Interestingly, the *Bifidobacterium* spp. population

210 increased  $\sim 1.5 \log_{10}$  cfu ml<sup>-1</sup> and returned to equilibration period level approximately 5 days  
211 post antibiotic exposure.

212 Rifaximin  $\kappa$  induced declines in *Lactobacillus* spp. ( $\sim 1 \log_{10}$  cfu ml<sup>-1</sup>), *Enterococcus* spp.,  
213 total spores, and *Bifidobacterium* spp. (all  $\sim 2 \log_{10}$  cfu ml<sup>-1</sup>) and in *Bacteroides* spp. ( $\sim 3 \log_{10}$   
214 cfu ml<sup>-1</sup>) populations (Fig. 2c and Fig. S1c). All populations recovered before the end of  
215 antibiotic dosing, but *Bifidobacterium* spp. showed a further decline of  $\sim 1 \log_{10}$  cfu ml<sup>-1</sup>  
216 approximately a week after antibiotic exposure ended. Following recovery, *Enterococcus*  
217 spp. and *Bacteroides* spp. populations remained  $\sim 1 \log_{10}$  cfu ml<sup>-1</sup> higher compared with pre  
218 rifaximin  $\kappa$  instillation.

219 In all models, populations of total obligate anaerobes, total facultative anaerobes and lactose-  
220 fermenting Enterobacteriaceae remained stable throughout the experiment (Fig. S1). Whilst  
221 the levels of the total spores initially recovered to pre-antibiotic levels, in all models they  
222 later declined by  $\sim 1 \log_{10}$  cfu ml<sup>-1</sup>, which could be due to germination of these spores.

223

#### 224 **Microbial diversity analysis by 16S sequencing in the gut models**

225 The percentage of joined paired-end reads varied between 45.91% and 67.70%, and the  
226 number of reads per sample ranged from 19114 to 116233 (mean 74483) across all samples.  
227 Samples were normalised to the third lowest sample size, corresponding to 50736 reads, due  
228 to its considerable difference to the lowest values, 19114 and 25255. During equilibration  
229 phase, the global bacterial abundancies were similar in all models. Bifidobacteriaceae,  
230 Ruminococcaceae, Acidaminococcaceae, Lachnospiraceae and Rikenellaceae were the most  
231 abundant bacterial families, corresponding to  $>92\%$  of the total relative abundance in all  
232 models (Fig. S2 and Table S1). This corresponded to 15 bacterial genera (*Oscillospira*,  
233 *Bifidobacterium*, *Megasphaera*, *Faecalibacterium*, *Coprococcus*, *Acidaminococcus*,  
234 *Ruminococcus*, *Sutterella*, *Bacteroides*, *Parabacteroides*, *Pyramidobacter*, *Clostridium*,

235 *Dorea*, *Lactobacillus*, and *Lachnospira*) represented >99% of the overall relative abundance  
236 in all models (Fig. 3 and Table S2). In all models, genus *Oscillospira* and *Bifidobacterium*  
237 were highly abundant throughout the study. During rifaximin exposure, *Acidaminococcus*  
238 abundance increased in models A and B (20% and 11%, respectively). Instillation of  
239 rifaximin  $\alpha$  and  $\beta$  also increased the relative abundance of *Lachnospira* in 1.7% and 3.3%,  
240 respectively, with this genus remaining highly prevalent up to the end of the experiment in  
241 both models. The relative abundance of genera *Oscillospira* declined (5.8% and 26.5%, with  
242 antibiotic dosing in models A and B, respectively. In models A and B, relative abundance of  
243 genus *Bacteroides* decreased at the start of antibiotic dosing but recovered still during  
244 antibiotic instillation (from 0.39% to 0.7% in model A; and from 0.16% to 1.19% in model  
245 B). These trends are consistent with those observed by direct enumeration (Fig. 2A and 2B).  
246 Differences between the effects of rifaximin  $\alpha$  and  $\beta$  effects were also observed. During  
247 antibiotic dosing, genera *Megasphaera* and *Bifidobacterium* declined 8.5% and 5.3%,  
248 respectively, in model A but increased 3% and 10.7%, respectively, in model B. Relative  
249 abundance of genus *Faecalibacterium* increased 1.8% during rifaximin  $\alpha$  instillation, and  
250 declined at the same level in presence of rifaximin  $\beta$  (Fig. 3 and Table S2).  
251 In model C, genera *Bifidobacterium*, *Oscillospira*, and *Acidaminococcus* remained the most  
252 prevalent throughout the study. During rifaximin  $\kappa$  exposure, relative abundances of genera  
253 *Oscillospira*, *Megasphaera*, and *Sutterella*, increased 5.8%, 1.4% and 1.4%, respectively;  
254 whereas relative abundance of *Bifidobacterium* and *Acidaminococcus* declined 0.7% and  
255 3.5%, respectively. In model C, sequencing data also showed a decline in genus *Bacteroides*  
256 from 0.22% to 0.015% between day 15 and day 20, with this genus recovering during  
257 antibiotic instillation (0.38% at day 23), which is consistent with the data observed by culture  
258 (Figure 2c). At the end of the experiment, models A and B showed similar relative abundance  
259 of *Bifidobacterium* (27% in A, 28.2% in B), whereas model C showed a slightly lower

260 abundance of 20.62%. This is also consistent with the observations of bacterial culture, where  
261 at the end of the experiment, *Bifidobacterium* spp. counts are  $\sim 1 \log_{10}$  cfu ml<sup>-1</sup> lower in model  
262 C, compared to models A and B (Fig. 3 and Table S2).

263

#### 264 **Antimicrobial concentrations in Model A, B and C**

265 Mean bioactive concentrations of the soluble fraction of rifaximin  $\alpha$ ,  $\beta$  and  $\kappa$  peaked at 43.1  
266 mg l<sup>-1</sup>, 36.8 mg l<sup>-1</sup> and 61.9 mg l<sup>-1</sup> in vessel 3 of models A, B and C, respectively (Fig. 4a).  
267 Overall, the soluble phase of rifaximin was detected in vessel 3 from day 15 and persisted  
268 above the limit of detection (8 mg l<sup>-1</sup>) for the remainder of the experiment in all models. We  
269 detected sporadic increases in antibiotic concentrations in vessel 3 at day 31 and 35 in model  
270 A, at day 35 in model B, and at day 37 in model C. The insoluble phase of rifaximin  $\alpha$ ,  $\beta$  and  
271  $\kappa$  peaked at 5400 mg l<sup>-1</sup>, 4635.5 mg l<sup>-1</sup> and 4422.3 mg l<sup>-1</sup> in vessel 3 of models A, B and C,  
272 respectively (Fig. 4b). Antibiotic concentrations in vessel 3 remained above the limit of  
273 detection for 25 days for rifaximin  $\alpha$  and rifaximin  $\kappa$ , and until the end of the experiment for  
274 rifaximin  $\beta$ .

275

276 **Discussion**

277 Three *in vitro* gut models (A, B and C) were used to investigate the effects of three rifaximin  
278 formulations ( $\alpha$ ,  $\beta$  and  $\kappa$ ) on the gut microbiome. Bacterial populations were monitored  
279 continuously by selective and non-selective culture throughout the study. Additionally,  
280 variations in global bacterial communities resulting from rifaximin instillation were assessed  
281 by 16S sequencing. All rifaximin formulations caused less bacterial disruption of gut  
282 microbiota populations in the chemostat models than observed with other antibiotics, [19-21,  
283 24] which agrees with previous rifaximin studies [2, 11, 12, 15, 35]. Rifaximin formulations  
284  $\alpha$ ,  $\beta$  and  $\kappa$  caused similar alterations in the gut microbiota, with some obligate (*Bacteroides*  
285 spp. and *Bifidobacterium* spp.) and facultative anaerobic (*Enterococcus* spp.) populations  
286 affected the most. Despite rifaximin low solubility, [2, 4] the soluble phase remained above 8  
287 mg l<sup>-1</sup> in all models throughout the experiment. The insoluble phase showed concentrations  
288 100-fold higher than the soluble phase and similar to previously reported rifaximin' faecal  
289 concentrations (8000 mg l<sup>-1</sup>) [17]. Biofilm formation in the gut model vessels was previously  
290 reported and hypothesised to have a role in fidaxomicin persistence in the gut model [21].  
291 The occasional spikes in antibiotic concentration observed during recovery period could be  
292 associated with biofilm detachment from the vessel walls and subsequent release of antibiotic  
293 residue retained within the matrix. In all models, culture data showed a decrease of  
294 *Bacteroides* spp. populations at the start of rifaximin instillation, followed by a recovery to  
295 equilibration phase levels by the end of antibiotic dosing, and indeed before the elimination  
296 of bioactive antibiotic (which persisted in the insoluble phase for at least 3 weeks after dosing  
297 ended - Fig. 4). This is similar to the variations of the *Bacteroides* genus shown by the 16S  
298 sequencing data, particularly for models A and B. In the literature, *Bacteroides* abundance  
299 has been reported as unchanged [15] or increased [10, 12] after rifaximin dosing, however no  
300 testing was performed in those studies during antibiotic dosing. We observed that genus

301 *Bacteroides* populations were affected by rifaximin but recovered within few days, showing  
302 similar results pre and post-antibiotic period. This could be associated with the expansion of  
303 sub-populations less susceptible to rifaximin, as MICs within this genus can show a wide  
304 susceptibility range, from 0.25 to >1024 mg l<sup>-1</sup> [36]. This applies for instance to *B. fragilis*, a  
305 common component of the gut microbiota, present in these gut models (confirmed by  
306 MALDI-TOF identification, and whose polysaccharides are required for a normal immune  
307 system response and as such, may play a role in infection prevention [37]. Both bacterial  
308 culture and 16S sequencing data showed *Bifidobacterium* as highly prevalent in all models,  
309 with rifaximin exposure causing a decline in models A and C, and an increase in model B.  
310 Susceptibility of *Bifidobacterium* populations to each rifaximin formulation could explain  
311 these differences, as *Bifidobacterium* genus has been shown to be highly resistant to  
312 rifaximin, with MICs increasing up to 25 mg l<sup>-1</sup> during antibiotic exposure [35, 36]. As  
313 observed in patient studies, [13, 15, 35] our culture and sequencing data showed recovery of  
314 the microbial populations affected by rifaximin instillation, although differences in the  
315 relative abundance of some bacterial groups were observed.

316 Overall, taxonomic analysis showed a variety of bacterial families and genera that otherwise  
317 would not have been evident. Rifaximin κ appeared to have the least disruptive effect on the  
318 colonic microbiota, with culture populations showing quicker recovery (i.e. during antibiotic  
319 dosing), and the sequencing data revealing the least variation in relative abundance of  
320 prevalent genera. Despite the proprietary nature of the formulations tested, this study  
321 contributes with novel data on the effects of rifamycins on the healthy human gut microbiota  
322 and supports the idea that antibiotic modification can be performed without compromise drug  
323 bioavailability or aggravating the effects to the intestinal microbiota.

324 **Funding**

325 This study was initiated and financially supported by Teva Pharmaceuticals USA, Inc.. The  
326 Funder had no input on data analysis or in the preparation of the manuscript.

327

328

329 **Acknowledgements**

330 The authors thank Miss Kate Owen and Mrs Sharie Shearman for the technical assistance.

331

332

333 **Ethical approval**

334 The collection/use of faecal donations from healthy adult volunteers following informed  
335 consent was approved by the Leeds Institute of Health Sciences and Leeds Institute of Genetics,  
336 Health and Therapeutics and Leeds Institute of Molecular Medicine, University of Leeds joint  
337 ethics committee (reference HSLTLM/12/061).

338

339 **References**

340

- 341 1. **Gillis JC, Brogden RN.** Rifaximin. A review of its antibacterial activity,  
342 pharmacokinetic properties and therapeutic potential in conditions mediated by  
343 gastrointestinal bacteria. *Drugs* 1995;49(3):467-484.
- 344 2. **Adachi JA, DuPont HL.** Rifaximin: a novel nonabsorbed rifamycin for  
345 gastrointestinal disorders. *Clin Infect Dis* 2006;42(4):541-547.
- 346 3. **Baker DE.** Rifaximin: A non-absorbed oral antibiotic. *Rev Gastroenterol Disord*  
347 2005;5:19-30.
- 348 4. **Pimentel M, Park S, Mirocha J, Kane SV, Kong Y.** The effect of a nonabsorbed  
349 oral antibiotic (rifaximin) on the symptoms of the irritable bowel syndrome: a randomized  
350 trial. *Ann Intern Med* 2006;145(8):557-563.
- 351 5. **Sharara AI, Aoun E, Abdul-Baki H, Mounzer R, Sidani S et al.** A randomized  
352 double-blind placebo-controlled trial of rifaximin in patients with abdominal bloating and  
353 flatulence. *Am J Gastroenterol* 2006;101:326-333.
- 354 6. **Johnson S, Schriever C, Patel U, Patel T, Hecht DW et al.** Rifaximin Redux:  
355 Treatment of recurrent *Clostridium difficile* infections with Rifaximin immediately post-  
356 vancomycin treatment. *Anaerobe* 2009;15(6):290-291.
- 357 7. **Garey KW, Ghantaji SS, Shah DN, Habib M, Arora V et al.** A randomized,  
358 double-blind, placebo-controlled pilot study to assess the ability of rifaximin to prevent  
359 recurrent diarrhoea in patients with *Clostridium difficile* infection. *Journal of Antimicrobial*  
360 *Chemotherapy* 2011;66(12):2850-2855.
- 361 8. **Major G, Bradshaw L, Boota N, Sprange K, Diggle M et al.** Follow-on RifAxiMin  
362 for the Prevention of recurrence following standard treatment of Infection with



- 363 <em></em>Clostridium Difficile</em> (RAPID): a randomised placebo controlled trial.  
364 *Gut* 2019;68(7):1224.
- 365 9. **Bass NM, Mullen KD, Sanyal A, Poordad F, Neff G et al.** Rifaximin Treatment in  
366 Hepatic Encephalopathy. 2010;362(12):1071-1081.
- 367 10. **Soldi S, Vasileiadis S, Uggeri F, Campanale M, Morelli L et al.** Modulation of the  
368 gut microbiota composition by rifaximin in non-constipated irritable bowel syndrome  
369 patients: a molecular approach. *Clin Exp Gastroenterol* 2015;8:309-325.
- 370 11. **Ponziani FR, Scaldaferri F, Petito V, Paroni Sterbini F, Pecere S et al.** The Role  
371 of Antibiotics in Gut Microbiota Modulation: The Eubiotic Effects of Rifaximin. *Dig Dis*  
372 2016;34:269-278.
- 373 12. **Jorgensen SF, Macpherson ME, Bjornetro T, Holm K, Kummen M et al.**  
374 Rifaximin alters gut microbiota profile, but does not affect systemic inflammation - a  
375 randomized controlled trial in common variable immunodeficiency. *Sci Rep* 2019;9(1):167.
- 376 13. **Ponziani FR, Zocco MA, D'Aversa F, Pompili M, Gasbarrini A.** Eubiotic  
377 properties of rifaximin: Disruption of the traditional concepts in gut microbiota modulation.  
378 *World J Gastroenterol* 2017;23(25):4491-4499.
- 379 14. **Zhuang X, Tian Z, Li L, Zeng Z, Chen M et al.** Fecal Microbiota Alterations  
380 Associated With Diarrhea-Predominant Irritable Bowel Syndrome. *Front Microbiol*  
381 2018;9:1600.
- 382 15. **Maccaferri S, Vitali B, Klinder A, Kolida S, Ndagijimana M et al.** Rifaximin  
383 modulates the colonic microbiota of patients with Crohn's disease: an in vitro approach using  
384 a continuous culture colonic model system. *The Journal of antimicrobial chemotherapy*  
385 2010;65(12):2556-2565.

- 386 16. **Macfarlane GT, Macfarlane S, Gibson GR.** Validation of a Three-Stage Compound  
387 Continuous Culture System for Investigating the Effect of Retention Time on the Ecology  
388 and Metabolism of Bacteria in the Human Colon. *Microbial ecology* 1998;35(2):180-187.
- 389 17. **Jiang ZD, Ke S, Palazzini E, Riopel L, DuPont H.** In Vitro Activity and Fecal  
390 Concentration of Rifaximin after Oral Administration. *Antimicrob Agents Chemother*  
391 2000;44:2205-2206.
- 392 18. **Freeman J, O'Neill FJ, Wilcox MH.** Effects of cefotaxime and desacetylcefotaxime  
393 upon *Clostridium difficile* proliferation and toxin production in a triple-stage chemostat  
394 model of the human gut. *The Journal of antimicrobial chemotherapy* 2003;52(1):96-102.
- 395 19. **Chilton CH, Freeman J, Crowther GS, Todhunter SL, Nicholson S et al.** Co-  
396 amoxiclav induces proliferation and cytotoxin production of *Clostridium difficile* ribotype  
397 027 in a human gut model. *The Journal of antimicrobial chemotherapy* 2012;67(4):951-954.
- 398 20. **Saxton K, Baines SD, Freeman J, O'Connor R, Wilcox MH.** Effects of exposure of  
399 *Clostridium difficile* PCR ribotypes 027 and 001 to fluoroquinolones in a human gut model.  
400 *Antimicrob Agents Chemother* 2009;53(2):412-420.
- 401 21. **Chilton CH, Crowther GS, Freeman J, Todhunter SL, Nicholson S et al.**  
402 Successful treatment of simulated *Clostridium difficile* infection in a human gut model by  
403 fidaxomicin first line and after vancomycin or metronidazole failure. *The Journal of*  
404 *antimicrobial chemotherapy* 2014;69(2):451-462.
- 405 22. **Crook DW, Walker AS, Kean Y, Weiss K, Cornely OA et al.** Fidaxomicin versus  
406 vancomycin for *Clostridium difficile* infection: meta-analysis of pivotal randomized  
407 controlled trials. *Clin Infect Dis* 2012;55 Suppl 2:S93-103.
- 408 23. **Chilton CH, Freeman J.** Predictive Values of Models of *Clostridium difficile*  
409 Infection. *Infectious Disease Clinics of North America* 2015;29:163-177.

- 410 24. **Moura IB, Buckley AM, Ewin D, Shearman S, Clark E et al.** Omadacycline Gut  
411 Microbiome Exposure Does Not Induce Clostridium difficile Proliferation or Toxin  
412 Production in a Model That Simulates the Proximal, Medial, and Distal Human Colon.  
413 *Antimicrob Agents Chemother* 2019;63(2):e01581-01518.
- 414 25. **Freeman J, Baines SD, Jabes D, Wilcox MH.** Comparison of the efficacy of  
415 ramoplanin and vancomycin in both in vitro and in vivo models of clindamycin-induced  
416 Clostridium difficile infection. *The Journal of antimicrobial chemotherapy* 2005;56(4):717-  
417 725.
- 418 26. **Claesson MJ WQ, O'Sullivan O, Greene-Diniz R, Cole JR, Ross RP, O'Toole  
419 PW.** Comparison of two next-generation sequencing technologies for resolving highly  
420 complex microbiota composition using tandem variable 16S rRNA gene regions. *Nucleic  
421 Acids Research* 2010;38(22):e200.
- 422 27. **Taylor M, Wood HM, Halloran SP, Quirke P.** Examining the potential use and  
423 long-term stability of guaiac faecal occult blood test cards for microbial DNA 16S rRNA  
424 sequencing. *Journal of Clinical Pathology* 2016(0):1-7.
- 425 28. **Martin M.** Cutadapt removes adapter sequences from high-throughput sequencing  
426 reads. *J EMBnet* 2011;17:10.
- 427 29. **Aronesty E.** Command-line tools for processing biological sequencing data.  
428 <https://github.com/ExpressionAnalysis/ea-utils> 2011.
- 429 30. **Caporaso JG, Kuczynski J, Stombaugh J, Bittinger K, Bushman FD et al.** QIIME  
430 allows analysis of high-throughput community sequencing data. *Nature Methods* 2010;7:335-  
431 336.
- 432 31. **Edgar RC.** Search and clustering orders of magnitude faster than BLAST.  
433 *Bioinformatics* 2010;26:2460-2461.

- 434 32. **Caporaso JG, Bittinger K, Bushman FD, DeSantis TZ, Andersen GL et al.**  
435 PyNAST: a flexible tool for aligning sequences to a template alignment. *Bioinformatics*  
436 2010;26:266-267.
- 437 33. **Wang Q, Garrity GM, Tiedje JM, Cole JR.** Naïve Bayesian classifier for rapid  
438 assignment of rRNA sequences into the new bacterial taxonomy. *Applied and Environmental*  
439 *Microbiology* 2007;73:5261-5267.
- 440 34. **Huson DH, Beier S, Flade I, Górska A, El-Hadidi M et al.** MEGAN Community  
441 Edition - Interactive Exploration and Analysis of Large-Scale Microbiome Sequencing Data.  
442 *PLoS Computational Biology* 2016;12:e1004957.
- 443 35. **Brigidi P, Swennen E, Rizzello F, Bozzolasco M, Matteuzzi D.** Effects of rifaximin  
444 administration on the intestinal microbiota in patients with ulcerative colitis. *J Chemother*  
445 2002;14(3):290-295.
- 446 36. **Finegold SM, Molitoris D, Vaisanen ML.** Study of the in vitro activities of  
447 rifaximin and comparator agents against 536 anaerobic intestinal bacteria from the  
448 perspective of potential utility in pathology involving bowel flora. *Antimicrob Agents*  
449 *Chemother* 2009;53(1):281-286.
- 450 37. **Wexler HM.** Bacteroides: the Good, the Bad, and the Nitty-Gritty. *Clinical*  
451 *Microbiology Reviews* 2007;20(4):593–621.
- 452
- 453
- 454
- 455
- 456
- 457
- 458

459 **Table 1.** Target populations and agar composition for bacterial enumeration.

| Target populations                                | Agar                                             | Supplements                                                                                                     |
|---------------------------------------------------|--------------------------------------------------|-----------------------------------------------------------------------------------------------------------------|
| Total anaerobes and total <i>Clostridium</i> spp. | Fastidious anaerobe agar                         | 5% horse blood                                                                                                  |
| <i>Bifidobacterium</i> spp.                       | 42.5 g/L Columbia agar, and 5 g/L agar technical | 0.5 g/L cysteine HCl, 5 g/L glucose                                                                             |
| <i>Bacteroides</i> spp.                           | Bacteroides bile aesculin agar                   | 5mg/L haemin, 10 µL/L vitamin K, 7.5 mg/L vancomycin, 1 mg/L penicillin, 75 mg/L kanamycin and 10 mg/L colistin |
| <i>Lactobacillus</i> spp.                         | 52.2 g/L MRS broth and 20 g/L agar technical     | 0.5 g/L cysteine hydrochloride, 20 mg/L vancomycin                                                              |
| Total facultative anaerobes                       | Nutrient agar                                    | N/A                                                                                                             |
| Lactose fermenting Enterobacteriaceae             | MaConkey's agar                                  | N/A                                                                                                             |
| <i>Enterococcus</i> spp.                          | <i>Kanamycin aesculin azide agar</i>             | 10 mg/L nalidixic acid, 10 mg/L aztreonam, and 20 mg/L kanamycin                                                |
| Total spores (following alcohol shock for 1 hour) | Fastidious anaerobe agar                         | 5% horse blood                                                                                                  |

460

461

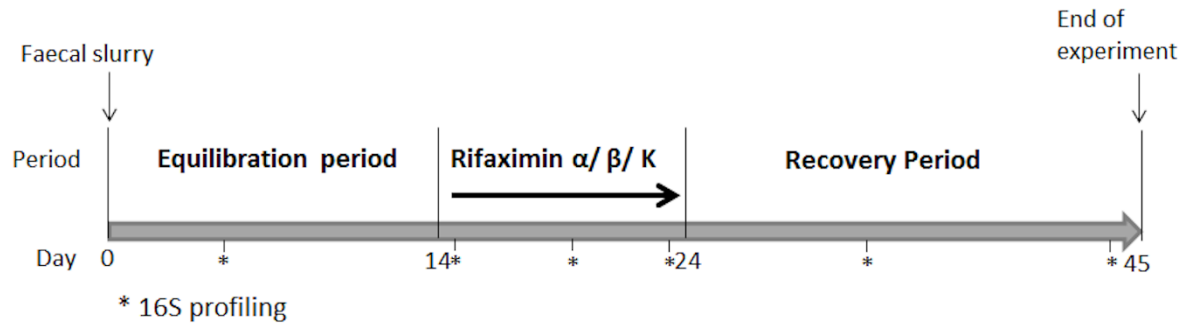

462

463

464 **Figure 1.** Outline of the gut model experiments with rifaximin  $\alpha$  (Model A), rifaximin  $\beta$   
465 (Model B), or rifaximin  $\kappa$  (Model C). Asterisks indicate the time points (days 5, 15, 20, 23,  
466 33 and 44) of sample collection for DNA extraction and microbial diversity analysis by 16S  
467 rRNA gene amplicon sequencing.

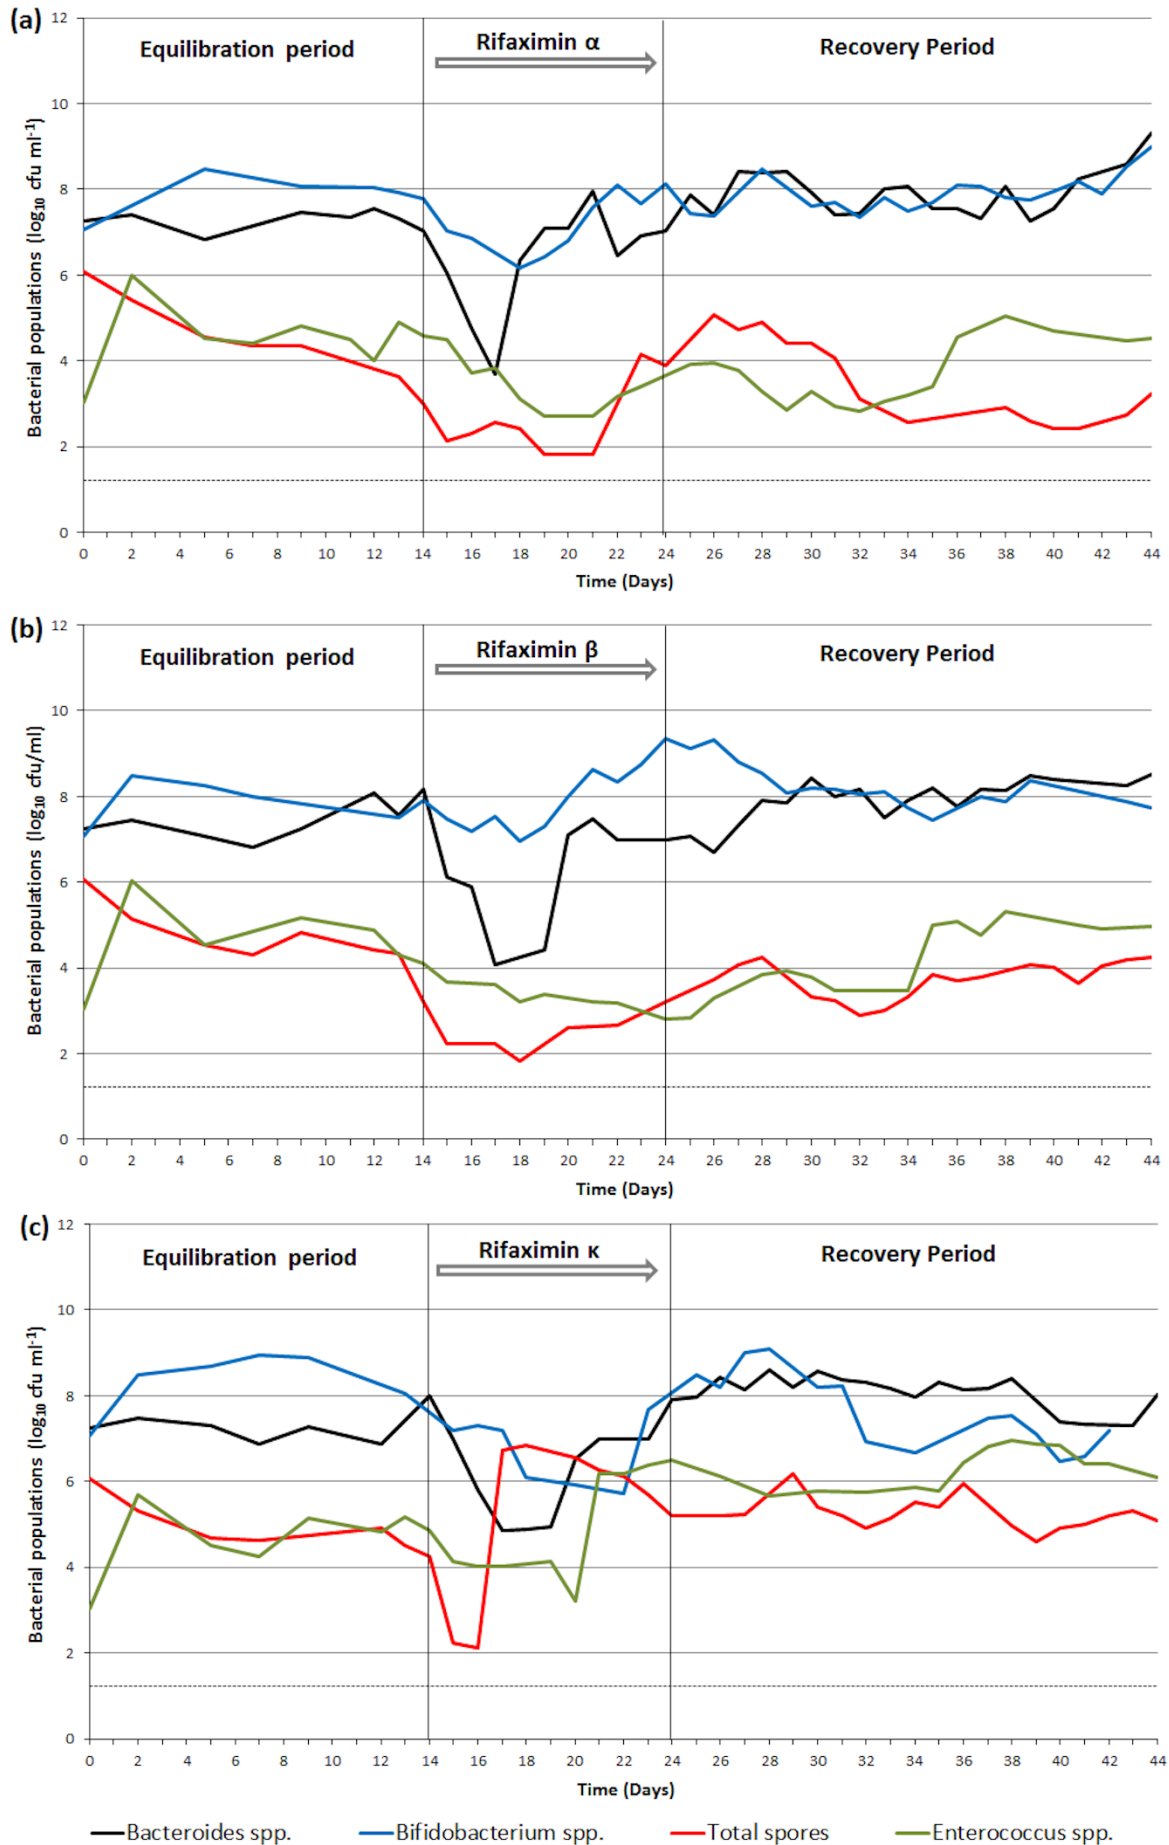

469 **Figure 2.** Mean ( $\log_{10}$  cfu ml<sup>-1</sup>) gut microbiota populations that showed variations during  
470 antibiotic instillation in vessel 3 of (a) model A (rifaximin  $\alpha$  dosing), (b) model B (rifaximin  $\beta$   
471 dosing), (c) model C (rifaximin  $\kappa$  dosing). Horizontal dotted line marks the limit of detection  
472 for culture assay ( $\sim 1.2 \log_{10}$  cfu ml<sup>-1</sup>).



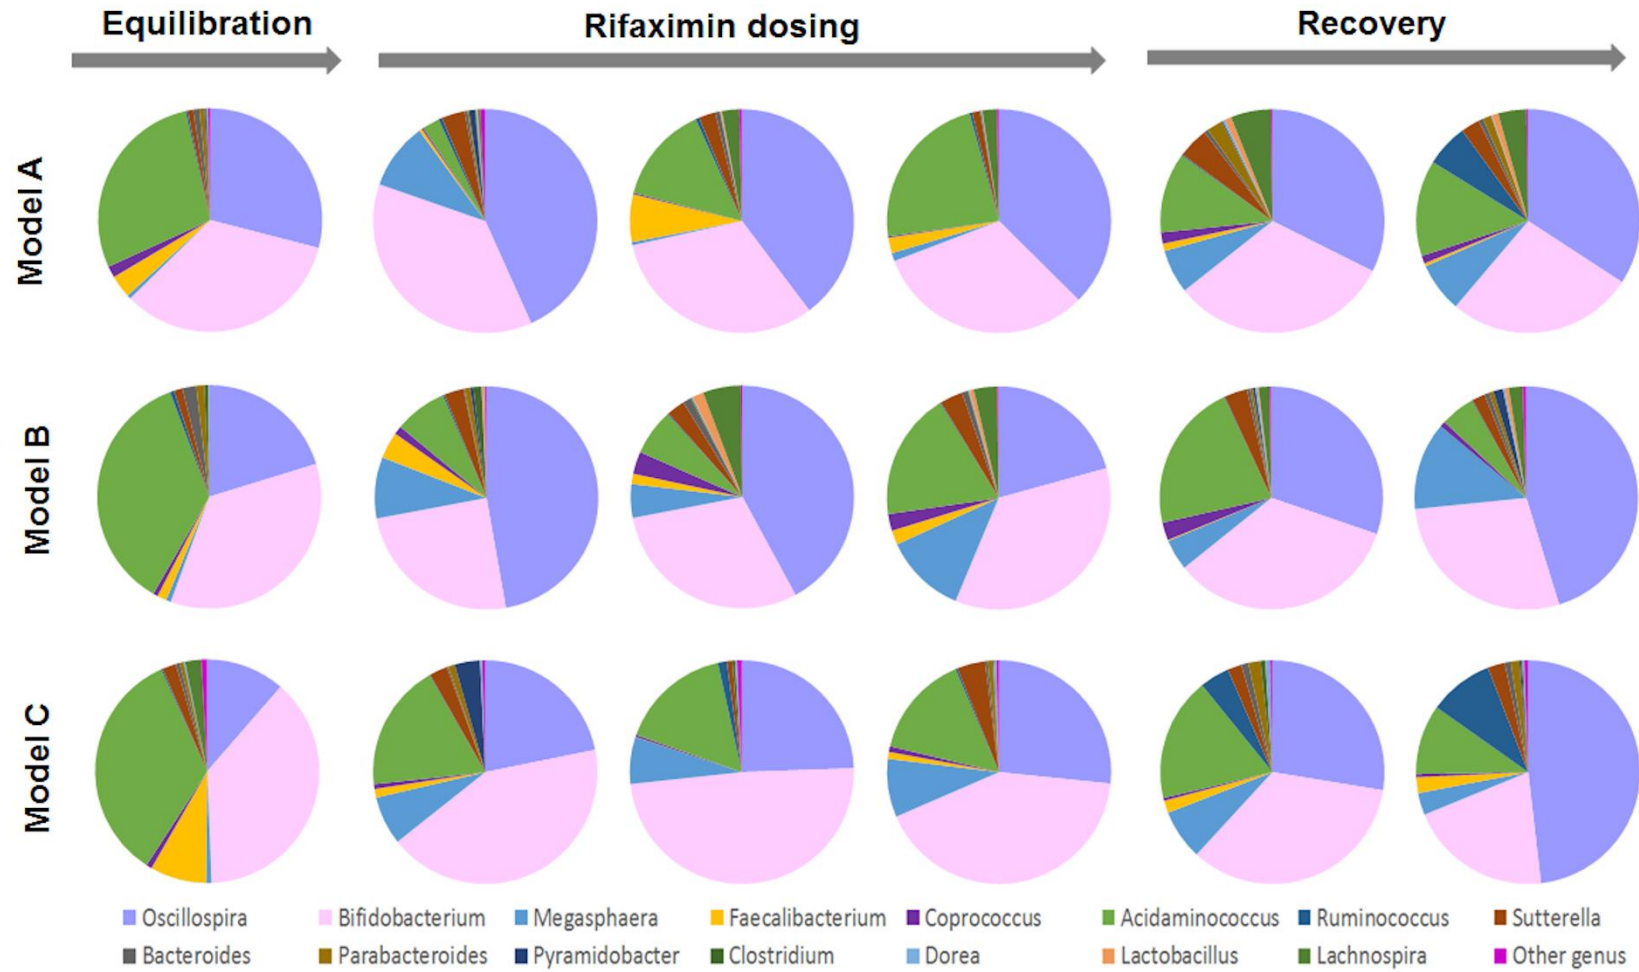

473

474 **Figure 3.** Pie charts constructed using bacterial OTUs assigned to a genus taxonomic level in models A, B and C throughout the experiment.

475 Timeline for equilibration, rifaximin dosing and recovery periods are described in Figure 1. The legend shows the most abundant taxonomic genera.

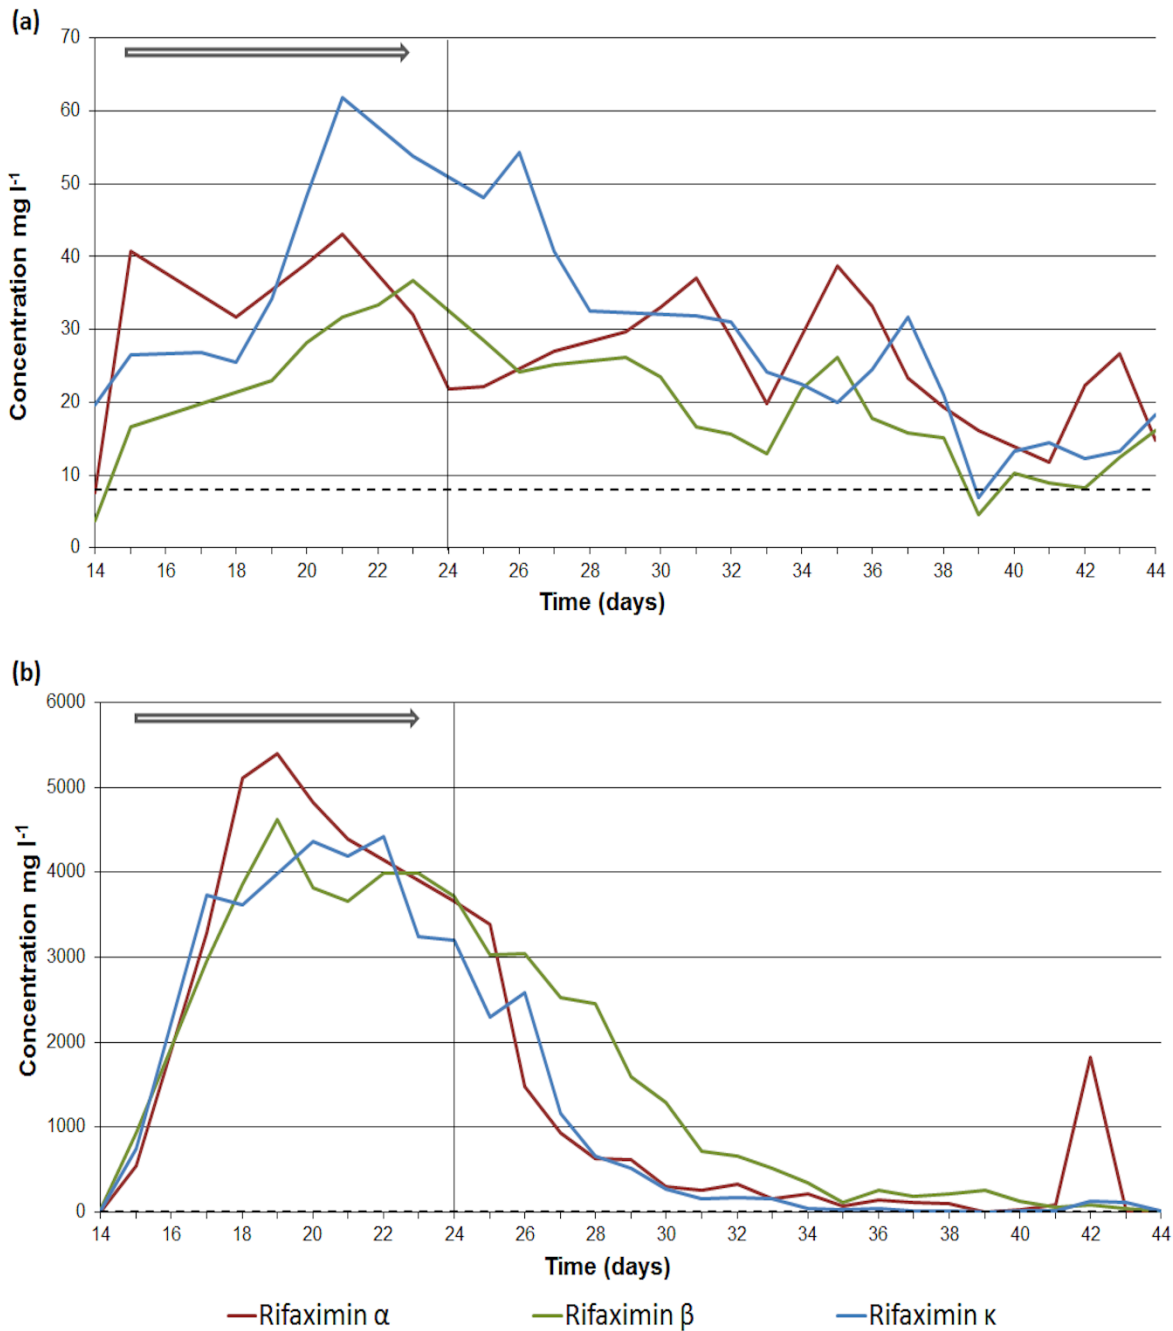

476

477

478 **Figure 4.** Antimicrobial concentration (mg l<sup>-1</sup>) in vessel 3 of model A, B and C regarding (a)

479 soluble rifaximin, (b) insoluble phase of rifaximin. Horizontal arrow defines the period of

480 antimicrobial instillation. Horizontal dotted line marks the limit of detection (8 mg l<sup>-1</sup>) for the

481 antimicrobial bioassay.

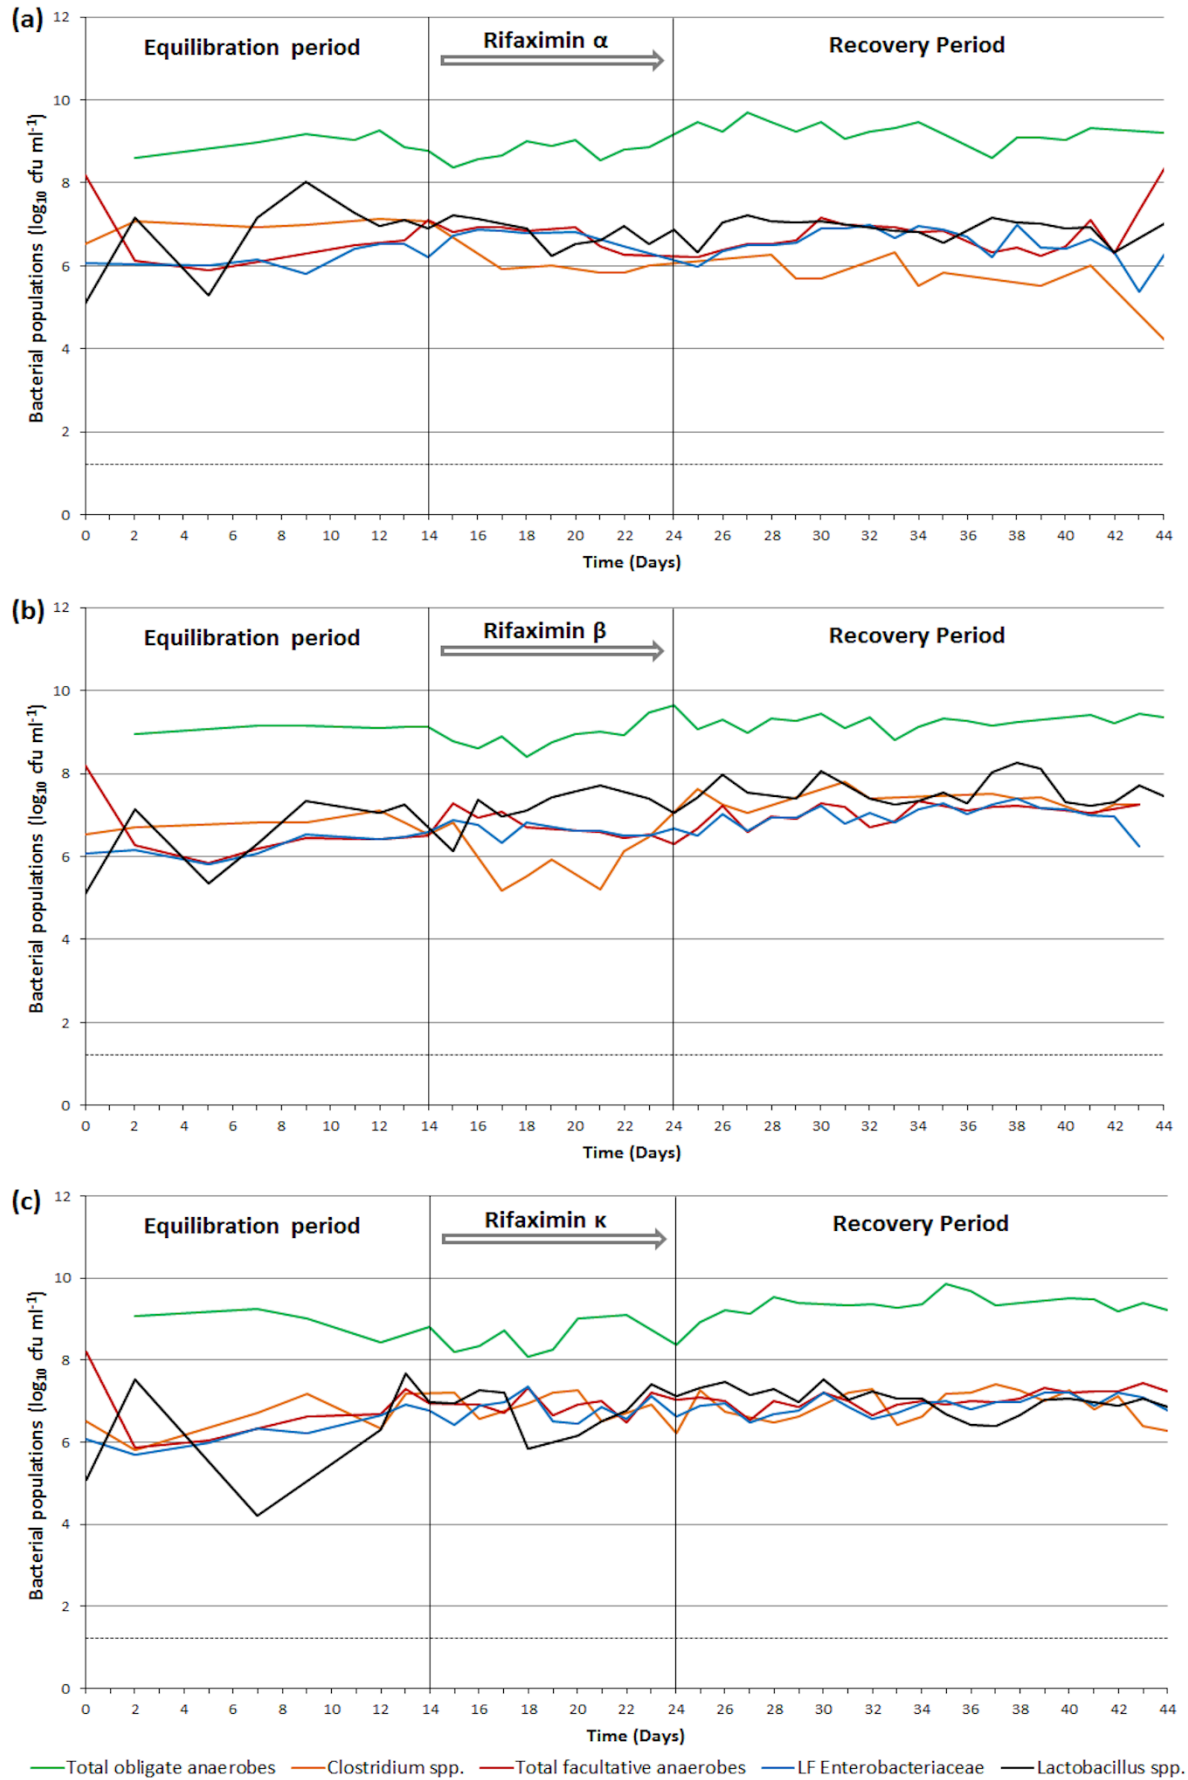

483 **Supplementary Figure 1.** Mean gut microbiota populations ( $\log_{10}$  cfu  $\text{ml}^{-1}$ ), in vessel 3 of (a)  
484 model A (rifaximin  $\alpha$  dosing), (b) model B (rifaximin  $\beta$  dosing), (c) model C (rifaximin  $\kappa$   
485 dosing). Horizontal dotted line marks the limit of detection for culture assay ( $\sim 1.2 \log_{10}$  cfu  
486  $\text{ml}^{-1}$ ). LF Enterobacteriaceae, lactose-fermenting Enterobacteriaceae.

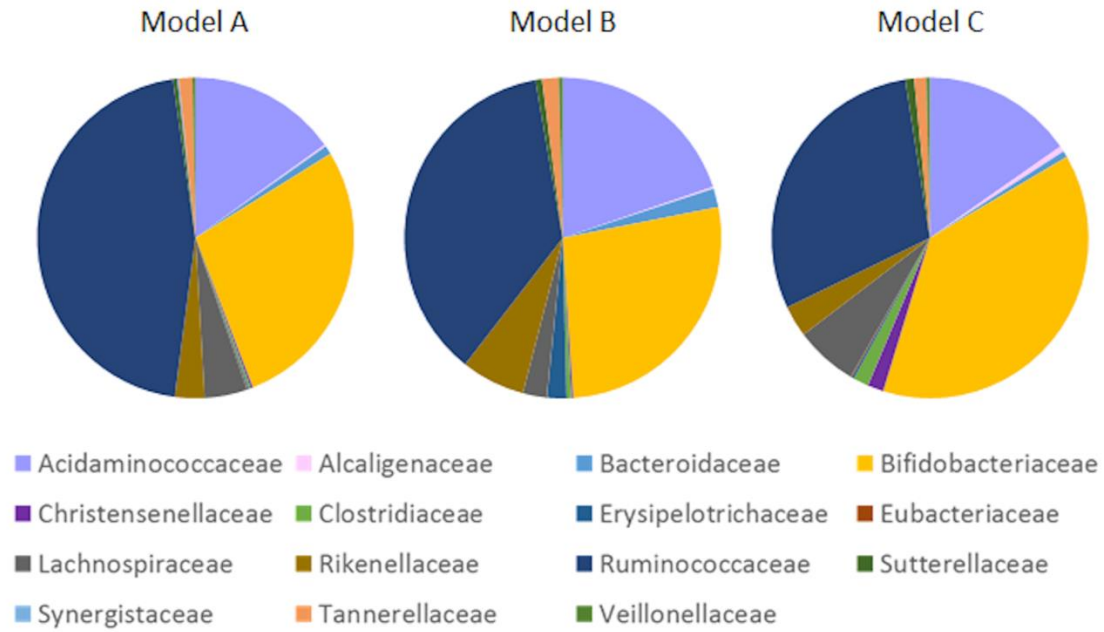

487

488 **Supplementary Figure 2.** Pie charts constructed using bacterial OTUs assigned to a family

489 taxonomic level in stationary phase of models A, B and C. The legend shows the most

490 abundant taxonomic families.

491 **Supplementary Table 1.** Bacterial abundance at family level, in all models throughout the  
492 experiment.

493

494

495 **Supplementary Table 2.** Bacterial abundance at genus level, in all models throughout the  
496 experiment.
