# Supplementary material for: Profiling the effects of rifaximin on the healthy human colonic microbiota using a chemostat model
Source: bioRxiv or medRxiv preprint supplement (doi:10.1101/828269), 2019-11-01
Supplement: Supplementary file [file media-2.pdf]

## Abundance %

## Model A

| Bacterial Genus       | Stationary | Rifaximin Period |           |           |           | Recovery Period |  |
|-----------------------|------------|------------------|-----------|-----------|-----------|-----------------|--|
|                       | Phase      |                  |           |           |           |                 |  |
|                       | Day 5      | Day 15           | Day 20    | Day 23    | Day 33    | Day 44          |  |
| Oscillospira          | 29.019716  | 43.289219        | 39.73106  | 37.450863 | 32.395287 | 34.198063       |  |
| Bifidobacterium       | 33.633713  | 37.042725        | 31.787823 | 31.739561 | 31.943886 | 27.00218        |  |
| Megasphaera           | 0.565121   | 9.663425         | 0.470049  | 1.182694  | 6.364948  | 7.199161        |  |
| Faecalibacterium      | 3.275479   | 0.414321         | 6.869264  | 2.244087  | 1.037052  | 0.41625         |  |
| Coprococcus           | 1.675923   | 0.255904         | 0.22015   | 0.20217   | 1.64955   | 1.150424        |  |
| Acidaminococcus       | 28.29353   | 2.4908           | 14.14164  | 22.919334 | 11.587126 | 13.860802       |  |
| Ruminococcus          | 0.290197   | 0.533743         | 0.553349  | 0.403217  | 0.192979  | 6.170007        |  |
| Sutterella            | 0.827548   | 3.338939         | 2.378509  | 1.118674  | 4.445228  | 2.728569        |  |
| Bacteroides           | 0.89975    | 0.389949         | 0.708049  | 0.17746   | 0.599074  | 0.680094        |  |
| Parabacteroides       | 0.715079   | 0.25103          | 0         | 0.010108  | 2.265405  | 1.202865        |  |
| Pyramidobacter        | 0.206887   | 0.870074         | 0.002975  | 0         | 0.199691  | 0.014749        |  |
| Clostridium           | 0.131908   | 0.129171         | 0.014875  | 0.015724  | 0.010068  | 0.01311         |  |
| Dorea                 | 0.126354   | 0.148668         | 0.07735   | 0.080868  | 0.342328  | 0.12127         |  |
| Lactobacillus         | 0          | 0.114548         | 0.2023    | 0.069636  | 0.939723  | 0.920994        |  |
| Blautia               | 0.026382   | 0.17304          | 0.055037  | 0.055035  | 0.010068  | 0.011471        |  |
| Desulfovibrio         | 0.012497   | 0.282713         | 0.229075  | 0.150504  | 0.063767  | 0.145851        |  |
| Christensenella       | 0.002777   | 0.026809         | 0         | 0         | 0         | 0               |  |
| Lachnospira           | 0.031936   | 0.355829         | 2.469246  | 2.087966  | 5.791046  | 4.051064        |  |
| Phascolarctobacterium | 0.069425   | 0.009749         | 0         | 0.004493  | 0         | 0.003278        |  |
| Pediococcus           | 0          | 0.004874         | 0.004462  | 0.001123  | 0         | 0               |  |
| Holdemania            | 0.020828   | 0.124296         | 0.02975   | 0.06402   | 0.031883  | 0.021304        |  |
| Anaerotruncus         | 0.022216   | 0.012186         | 0         | 0.001123  | 0.001678  | 0               |  |
| Anaerofustis          | 0.062483   | 0.019497         | 0         | 0         | 0         | 0               |  |
| Eggerthella           | 0.004166   | 0.004874         | 0         | 0.010108  | 0.023493  | 0.022943        |  |
| Turicibacter          | 0.051375   | 0.01706          | 0.001487  | 0.005616  | 0.005034  | 0.006555        |  |
| Bilophila             | 0.002777   | 0.002437         | 0.001487  | 0.002246  | 0.010068  | 0.014749        |  |
| Prevotella            | 0.001389   | 0.002437         | 0         | 0         | 0.001678  | 0               |  |
| Peptococcus           | 0.001389   | 0.002437         | 0         | 0         | 0         | 0               |  |
| Allobaculum           | 0.001389   | 0.002437         | 0.001487  | 0         | 0         | 0               |  |
| Odoribacter           | 0.00972    | 0                | 0         | 0         | 0         | 0.001639        |  |
| Corynebacterium       | 0.002777   | 0                | 0         | 0         | 0         | 0               |  |
| Collinsella           | 0.002777   | 0                | 0.049087  | 0         | 0.083904  | 0.036053        |  |
| Coprobacillus         | 0.002777   | 0                | 0         | 0         | 0         | 0               |  |
| Butyrivimonas         | 0.001389   | 0                | 0         | 0         | 0         | 0               |  |
| Flexispira            | 0.001389   | 0                | 0         | 0.001123  | 0         | 0.001639        |  |
| Escherichia           | 0.001389   | 0                | 0         | 0         | 0         | 0               |  |
| Slackia               | 0.001389   | 0                | 0         | 0         | 0         | 0               |  |
| Dehalobacterium       | 0.001389   | 0.004874         | 0         | 0         | 0         | 0               |  |
| Anaerostipes          | 0.001389   | 0                | 0         | 0         | 0         | 0               |  |
| Veillonella           | 0.001389   | 0.002437         | 0         | 0         | 0         | 0               |  |
| Mucispirillum         | 0          | 0.002437         | 0         | 0         | 0         | 0               |  |
| Acinetobacter         | 0          | 0                | 0.001487  | 0         | 0         | 0               |  |
| Micrococcus           | 0          | 0.002437         | 0         | 0         | 0         | 0               |  |
| Enterococcus          | 0          | 0                | 0         | 0         | 0         | 0.001639        |  |
| Oxobacter             | 0          | 0.004874         | 0         | 0         | 0         | 0               |  |
| Roseburia             | 0          | 0                | 0         | 0         | 0.001678  | 0               |  |
| Anaerofilum           | 0          | 0.002437         | 0         | 0         | 0         | 0               |  |
| Megamonas             | 0          | 0                | 0         | 0.001123  | 0         | 0               |  |
| Anaeroplasma          | 0          | 0                | 0         | 0         | 0         | 0.001639        |  |
| Methanobrevibacter    | 0          | 0.007312         | 0         | 0.001123  | 0.003356  | 0.001639        |  |

## Abundance %

## Model B

| Bacterial Genus       | Abundance %      |                  |          |          |                 |          |
|-----------------------|------------------|------------------|----------|----------|-----------------|----------|
|                       | Stationary Phase | Rifaximin Period |          |          | Recovery Period |          |
|                       | Day 5            | Day 15           | Day 20   | Day 23   | Day 33          | Day 44   |
| Oscillospira          | 20.113325        | 47.22475         | 42.10556 | 20.71148 | 30.27105        | 45.24741 |
| Bifidobacterium       | 35.095963        | 24.81319         | 29.85887 | 35.59251 | 33.94846        | 28.16672 |
| Megasphaera           | 0.711731         | 8.899494         | 4.906878 | 11.87341 | 4.472561        | 12.70487 |
| Faecalibacterium      | 1.323268         | 3.839276         | 1.476538 | 2.069762 | 0.146068        | 0        |
| Coprococcus           | 0.701366         | 1.225679         | 3.26628  | 2.453223 | 2.606594        | 0.822843 |
| Acidaminococcus       | 35.74205         | 7.592103         | 6.70967  | 18.51698 | 21.59132        | 4.946001 |
| Ruminococcus          | 0.606354         | 0.266452         | 0.149145 | 0.14322  | 0.116237        | 0.138631 |
| Sutterella            | 1.228255         | 2.83268          | 2.664106 | 3.294063 | 3.319447        | 1.873756 |
| Bacteroides           | 1.983174         | 0.16224          | 1.187569 | 0.887041 | 0.485522        | 0.699864 |
| Parabacteroides       | 1.153972         | 0.795803         | 0.005593 | 0.0693   | 0.385743        | 0.641728 |
| Pyramidobacter        | 0.003455         | 0.460666         | 0.020507 | 0.01386  | 0.36517         | 1.406435 |
| Clostridium           | 0.528616         | 1.187783         | 0.160331 | 0.02772  | 0.02263         | 0.004472 |
| Dorea                 | 0.120925         | 0.099475         | 0.139824 | 0.1617   | 0.27362         | 0.263846 |
| Lactobacillus         | 0.005183         | 0.348164         | 1.63314  | 0.586741 | 0.169727        | 0.565704 |
| Lachnospira           | 0.022458         | 0.05329          | 5.484815 | 3.400323 | 1.59749         | 2.023567 |
| Anaerotruncus         | 0.010365         | 0.024869         | 0.001864 | 0        | 0.003086        | 0        |
| Holdemania            | 0.031095         | 0.005921         | 0.007457 | 0.00462  | 0.010286        | 0.071552 |
| Prevotella            | 0.036278         | 0.001184         | 0        | 0        | 0               | 0        |
| Blautia               | 0.081193         | 0.045001         | 0.137959 | 0.09702  | 0.054518        | 0.013416 |
| Phascolarctobacterium | 0.191753         | 0.005921         | 0.003729 | 0        | 0.002057        | 0.002236 |
| Bilophila             | 0.005183         | 0.013027         | 0.022372 | 0.01386  | 0.002057        | 0.008944 |
| Anaerofustis          | 0.015548         | 0.004737         | 0.001864 | 0.00924  | 0.011315        | 0        |
| Christensenella       | 0                | 0.001184         | 0.001864 | 0        | 0.013372        | 0.038012 |
| Desulfovibrio         | 0.031095         | 0.047369         | 0.016779 | 0.0231   | 0.051432        | 0.163227 |
| Eggerthella           | 0                | 0.005921         | 0        | 0.01386  | 0.012344        | 0.024596 |
| Turicibacter          | 0.171023         | 0.010658         | 0.007457 | 0.00462  | 0.006172        | 0.01118  |
| Collinsella           | 0.051825         | 0                | 0.001864 | 0        | 0.050404        | 0.040248 |
| Butyricimonas         | 0.01382          | 0                | 0        | 0        | 0               | 0        |
| Alistipes             | 0.005183         | 0                | 0        | 0        | 0               | 0        |
| Dehalobacterium       | 0.005183         | 0.001184         | 0        | 0.00462  | 0               | 0        |
| Enterococcus          | 0.003455         | 0                | 0        | 0        | 0               | 0        |
| Slackia               | 0.001728         | 0                | 0        | 0        | 0               | 0        |
| Peptococcus           | 0.001728         | 0.001184         | 0.001864 | 0        | 0.001029        | 0.002236 |
| Coprobacillus         | 0.001728         | 0                | 0        | 0        | 0               | 0        |
| Megamonas             | 0.001728         | 0                | 0        | 0        | 0               | 0        |
| Mucispirillum         | 0                | 0                | 0.001864 | 0.00462  | 0.001029        | 0        |
| Odoribacter           | 0                | 0                | 0        | 0.00462  | 0               | 0        |
| Lautropia             | 0                | 0                | 0        | 0        | 0.001029        | 0        |
| Flexispira            | 0                | 0                | 0        | 0        | 0               | 0.002236 |
| Citrobacter           | 0                | 0.001184         | 0        | 0        | 0.008229        | 0.053664 |
| Akkermansia           | 0                | 0                | 0.001864 | 0        | 0               | 0        |
| Brevibacterium        | 0                | 0                | 0        | 0        | 0               | 0.002236 |
| Anaerobacillus        | 0                | 0                | 0.001864 | 0        | 0               | 0        |
| Bacillus              | 0                | 0                | 0        | 0        | 0               | 0.049192 |
| Pediococcus           | 0                | 0.021316         | 0.01305  | 0        | 0               | 0        |
| Streptococcus         | 0                | 0                | 0        | 0        | 0               | 0        |
| Caldicoprobacter      | 0                | 0.001184         | 0        | 0        | 0               | 0        |
| Anaerostipes          | 0                | 0.001184         | 0.001864 | 0        | 0               | 0.004472 |
| Allobaculum           | 0                | 0.002368         | 0.003729 | 0        | 0               | 0        |
| Catenibacterium       | 0                | 0                | 0        | 0        | 0               | 0        |
| Dialister             | 0                | 0.002368         | 0        | 0.00924  | 0               | 0        |
| Veillonella           | 0                | 0.001184         | 0        | 0.00924  | 0               | 0.006708 |
| Methanobrevibacter    | 0                | 0                | 0.001864 | 0        | 0               | 0        |

## Abundance %

## Model C

| Bacterial Genus       | Stationary Phase | Rifaximin Period |          |          | Recovery Period |          |
|-----------------------|------------------|------------------|----------|----------|-----------------|----------|
|                       | Day 5            | Day 15           | Day 20   | Day 23   | Day 33          | Day 44   |
| Oscillospira          | 11.373931        | 21.8063          | 24.45204 | 26.64747 | 27.59276        | 48.16664 |
| Bifidobacterium       | 38.018551        | 42.49017         | 48.83443 | 41.83551 | 34.22986        | 20.6206  |
| Megasphaera           | 0.790855         | 7.043123         | 6.777964 | 8.433627 | 7.26607         | 3.205025 |
| Faecalibacterium      | 8.109857         | 1.245854         | 0.032649 | 0.976412 | 1.783661        | 2.270897 |
| Coprococcus           | 0.848372         | 0.709712         | 0.319962 | 0.83156  | 0.441221        | 0.499275 |
| Acidaminococcus       | 34.093033        | 18.39466         | 16.14392 | 14.90907 | 17.86008        | 10.05351 |
| Ruminococcus          | 0.215688         | 0.111857         | 1.292906 | 0.323682 | 4.301908        | 9.346647 |
| Sutterella            | 2.005895         | 2.640207         | 0.768343 | 4.04156  | 2.041822        | 2.462375 |
| Bacteroides           | 0.567978         | 0.217928         | 0.015236 | 0.384485 | 1.030299        | 0.878653 |
| Parabacteroides       | 0.496082         | 0.939212         | 0.00653  | 0.692072 | 1.753151        | 1.249083 |
| Pyramidobacter        | 0.00719          | 3.654632         | 0        | 0.007153 | 0               | 0.238006 |
| Clostridium           | 0.107844         | 0.017357         | 0.393966 | 0.162735 | 0.692342        | 0.245164 |
| Dorea                 | 0.165361         | 0.244928         | 0.25684  | 0.364813 | 0.675914        | 0.189689 |
| Lactobacillus         | 0                | 0.025071         | 0.002177 | 0.003577 | 0.011735        | 0.014316 |
| Lachnospira           | 2.343806         | 0.017357         | 0.017413 | 0.012518 | 0.004694        | 0.010737 |
| Christensenella       | 0.00719          | 0.028928         | 0        | 0        | 0               | 0        |
| Blautia               | 0.273204         | 0.057857         | 0.037002 | 0.02146  | 0.086836        | 0.044738 |
| Corynebacterium       | 0                | 0.061714         | 0.004353 | 0        | 0               | 0        |
| Holdemania            | 0.028758         | 0.167785         | 0.185012 | 0.062591 | 0.028163        | 0.143161 |
| Desulfotomaculum      | 0                | 0.023143         | 0        | 0        | 0               | 0        |
| Bilophila             | 0                | 0.0135           | 0.002177 | 0.014306 | 0.004694        | 0.00179  |
| Anaerotruncus         | 0.021569         | 0.001929         | 0        | 0        | 0               | 0        |
| Eggerthella           | 0.014379         | 0.023143         | 0.002177 | 0.008942 | 0.011735        | 0.005369 |
| Anaerofustis          | 0.021569         | 0.0135           | 0.017413 | 0.003577 | 0.049285        | 0.005369 |
| Veillonella           | 0                | 0.023143         | 0.052239 | 0.078685 | 0               | 0.00179  |
| Turicibacter          | 0.150981         | 0.001929         | 0.004353 | 0.062591 | 0.002347        | 0.010737 |
| Anaerovorax           | 0.00719          | 0                | 0        | 0        | 0               | 0        |
| Phascolarctobacterium | 0.186929         | 0.003857         | 0.00653  | 0.001788 | 0.002347        | 0.014316 |
| Staphylococcus        | 0                | 0.001929         | 0        | 0        | 0               | 0        |
| Desulfovibrio         | 0.028758         | 0.001929         | 0.002177 | 0.007153 | 0.002347        | 0.141372 |
| Collinsella           | 0.014379         | 0.009643         | 0.032649 | 0.033978 | 0.042245        | 0.034001 |
| Mucispirillum         | 0                | 0.003857         | 0        | 0        | 0.002347        | 0        |
| Megamonas             | 0                | 0                | 0.002177 | 0        | 0               | 0        |
| Helicobacter          | 0.00719          | 0                | 0        | 0        | 0               | 0        |
| Prevotella            | 0                | 0                | 0        | 0        | 0               | 0.00179  |
| Pediococcus           | 0                | 0.001929         | 0        | 0        | 0               | 0        |
| Enterococcus          | 0                | 0                | 0.032649 | 0.041131 | 0.037551        | 0.087686 |
| Odoribacter           | 0.00719          | 0                | 0        | 0        | 0               | 0.00179  |
| Bulleidia             | 0                | 0                | 0.280783 | 0.026825 | 0.011735        | 0.008948 |
| Oxobacter             | 0                | 0                | 0        | 0        | 0.004694        | 0        |
| Anaeroplasma          | 0                | 0                | 0        | 0        | 0               | 0.00179  |
| Akkermansia           | 0                | 0                | 0.00653  | 0.003577 | 0               | 0        |
| Anaerobacillus        | 0                | 0                | 0.00653  | 0.003577 | 0               | 0.007158 |
| Peptococcus           | 0                | 0                | 0.00653  | 0        | 0.002347        | 0        |
| Haemophilus           | 0                | 0                | 0.002177 | 0.001788 | 0               | 0        |
| Gracilibacter         | 0                | 0                | 0.002177 | 0        | 0               | 0.00179  |
| Allobaculum           | 0.064706         | 0                | 0        | 0        | 0               | 0        |
| Butyrivibrio          | 0.00719          | 0                | 0        | 0        | 0               | 0        |
| Roseburia             | 0.00719          | 0                | 0        | 0        | 0               | 0        |
| Dialister             | 0.00719          | 0                | 0        | 0        | 0               | 0        |
| Lautropia             | 0                | 0                | 0        | 0.001788 | 0               | 0        |
| Flexispira            | 0                | 0                | 0        | 0        | 0               | 0.00179  |
| Citrobacter           | 0                | 0                | 0        | 0        | 0.002347        | 0.007158 |
| Micrococcus           | 0                | 0                | 0        | 0        | 0.018775        | 0.021474 |
| Caldicoprobacter      | 0                | 0                | 0        | 0        | 0.002347        | 0        |
| Acetobacterium        | 0                | 0                | 0        | 0        | 0               | 0        |
| Anaerostipes          | 0                | 0.001929         | 0        | 0        | 0.002347        | 0.00179  |
| Anaerococcus          | 0                | 0                | 0        | 0        | 0               | 0.003579 |
