# Supplementary material for: Profiling the effects of rifaximin on the healthy human colonic microbiota using a chemostat model
Source: bioRxiv preprint, doi:10.1101/828269, version 1 (2019-11-01)
Supplement: Table S1 - Abundance at Family level [file 828269_file02.pdf]

| Bacterial Families         | Model A          |                  |          |          |                 |          | Model B          |                  |          |          |                 |          | Model C          |                  |          |          |                 |          |        |        |        |
|----------------------------|------------------|------------------|----------|----------|-----------------|----------|------------------|------------------|----------|----------|-----------------|----------|------------------|------------------|----------|----------|-----------------|----------|--------|--------|--------|
|                            | Stationary Phase | Rifaximin Period |          |          | Recovery Period |          | Stationary Phase | Rifaximin Period |          |          | Recovery Period |          | Stationary Phase | Rifaximin Period |          |          | Recovery Period |          |        |        |        |
|                            |                  | Day 5            | Day 15   | Day 20   | Day 23          | Day 33   |                  | Day 44           | Day 5    | Day 15   | Day 20          | Day 23   |                  | Day 33           | Day 44   | Day 5    | Day 15          | Day 20   | Day 23 | Day 33 | Day 44 |
|                            |                  |                  |          |          |                 |          |                  |                  |          |          |                 |          |                  |                  |          |          |                 |          |        |        |        |
| Ruminococcaceae            | 45.5711          | 59.87955         | 53.37935 | 44.47407 | 35.15757        | 42.69115 | 36.60757         | 59.68607         | 52.99226 | 31.74623 | 35.74804        | 52.24818 | 29.47642         | 34.11489         | 30.77059 | 42.84358 | 34.35826        | 61.62512 |        |        |        |
| Bifidobacteriaceae         | 27.85621         | 26.7232          | 29.38023 | 31.18263 | 31.33146        | 26.2666  | 26.99324         | 20.92946         | 25.23219 | 34.93402 | 32.69568        | 23.5731  | 37.99667         | 42.04853         | 38.56944 | 32.23034 | 32.61749        | 18.29241 |        |        |        |
| Lachnospiraceae            | 4.327012         | 3.59152          | 4.213177 | 5.368818 | 10.4365         | 11.16767 | 2.416907         | 3.060841         | 9.301365 | 6.961728 | 8.331428        | 8.919614 | 6.33171          | 5.826574         | 3.807606 | 3.457133 | 6.37479         | 5.082999 |        |        |        |
| Acidaminococcaceae         | 15.1375          | 0.988677         | 9.101266 | 15.68082 | 6.890805        | 8.394356 | 19.79295         | 4.158026         | 3.813528 | 12.56308 | 13.33232        | 2.528709 | 15.27813         | 8.013565         | 9.223656 | 9.434429 | 8.32217         | 4.60276  |        |        |        |
| Veillonellaceae            | 0.308278         | 3.841002         | 0.304429 | 0.825913 | 3.819133        | 4.411502 | 0.401549         | 4.901363         | 2.80746  | 8.152839 | 2.777989        | 6.545164 | 0.3717           | 3.413865         | 5.341932 | 3.635321 | 3.399523        | 1.479167 |        |        |        |
| Tannerellaceae             | 1.374655         | 0.545411         | 0.007659 | 0.016902 | 5.298086        | 2.505408 | 1.67661          | 1.473066         | 0.025416 | 0.197474 | 0.785001        | 1.18494  | 1.208024         | 0.01296          | 0.561959 | 1.441866 | 2.189079        | 1.569977 |        |        |        |
| Sutterellaceae             | 0.441668         | 1.320164         | 1.530759 | 0.765218 | 2.643554        | 1.652081 | 0.676544         | 1.550187         | 1.513338 | 2.2349   | 2.049514        | 0.95755  | 0.894002         | 0.381238         | 2.500055 | 1.35385  | 0.951298        | 1.125737 |        |        |        |
| Lactobacillaceae           | 0.002223         | 0.089617         | 0.192422 | 0.090658 | 0.758438        | 0.732274 | 0.006661         | 0.457538         | 2.005782 | 0.893333 | 0.231817        | 0.731303 | 0                | 0.00324          | 0.004425 | 0.025712 | 0.017495        | 0.010636 |        |        |        |
| Bacteroidaceae             | 0.889264         | 0.24476          | 0.596412 | 0.1575   | 0.475021        | 0.549701 | 1.897367         | 0.121837         | 0.880045 | 0.783625 | 0.389325        | 0.452494 | 0.666496         | 0.02052          | 0.316379 | 0.159218 | 0.743543        | 0.590685 |        |        |        |
| Alcaligenaceae             | 0.16896          | 0.637919         | 0.438454 | 0.199756 | 0.882183        | 0.521919 | 0.176035         | 0.550861         | 0.514683 | 0.529731 | 0.661154        | 0.348512 | 0.551141         | 0.180359         | 0.825239 | 0.418319 | 0.5172          | 0.652862 |        |        |        |
| Eubacteriaceae             | 0.068177         | 0.091544         | 0.019146 | 0.365707 | 1.045846        | 0.450477 | 0.038062         | 0.105636         | 0.02118  | 0.137918 | 0.362015        | 0.353082 | 0.102538         | 0.186839         | 0.03208  | 0.126584 | 0.22853         | 0.229074 |        |        |        |
| Erysipelotrichaceae        | 0.132649         | 0.119489         | 0.156044 | 0.218195 | 0.187614        | 0.22127  | 1.972539         | 0.090082         | 0.109079 | 0.12538  | 0.238168        | 0.46392  | 0.256345         | 1.349994         | 0.396026 | 0.358983 | 0.262427        | 0.439332 |        |        |        |
| Clostridiaceae             | 0.210459         | 0.158998         | 0.186678 | 0.464816 | 0.243498        | 0.171658 | 0.475769         | 0.826291         | 0.308175 | 0.316585 | 0.178467        | 0.137119 | 1.54768          | 4.287581         | 1.484456 | 0.177019 | 9.830078        | 0.342033 |        |        |        |
| Desulfovibrionaceae        | 0.012598         | 0.160925         | 0.191465 | 0.126768 | 0.073848        | 0.127007 | 0.023788         | 0.040828         | 0.027534 | 0.028211 | 0.038107        | 0.114266 | 0.02243          | 0.00324          | 0.016593 | 0.015823 | 0.007654        | 0.102265 |        |        |        |
| Enterobacteriaceae         | 0.002964         | 0.015418         | 0.018189 | 0.006915 | 0.024949        | 0.036713 | 0.002855         | 0.01685          | 0.018003 | 0.018807 | 0.023499        | 0.202251 | 0.006409         | 0.01188          | 0.018806 | 0.026701 | 0.017495        | 0.080176 |        |        |        |
| Coriobacteriaceae          | 0.001482         | 0.000964         | 0.031592 | 0        | 0.049897        | 0.021829 | 0.032352         | 0                | 0.001059 | 0        | 0.031121        | 0.020568 | 0.006409         | 0.0162           | 0.021018 | 0.005934 | 0.019682        | 0.015544 |        |        |        |
| Synergistaceae             | 0.152657         | 0.516502         | 0.002872 | 0        | 0.185618        | 0.014884 | 0.001903         | 0.330516         | 0.016944 | 0.015673 | 0.292788        | 1.028395 | 0.009613         | 0.00216          | 0.006637 | 2.470357 | 0               | 0.175078 |        |        |        |
| Comamonadaceae             | 0.003705         | 0.014454         | 0.01436  | 0.005378 | 0.026944        | 0.013891 | 0.006661         | 0.006481         | 0.011649 | 0.021942 | 0.016513        | 0.009141 | 0.009613         | 0.00108          | 0.025443 | 0.015823 | 0.010934        | 0.006545 |        |        |        |
| Eggerthellaceae            | 0.002964         | 0.001927         | 0        | 0.006915 | 0.013971        | 0.013891 | 0.000952         | 0.00324          | 0        | 0.009404 | 0.007621        | 0.012569 | 0.006409         | 0.00108          | 0.005531 | 0.011867 | 0.005467        | 0.002454 |        |        |        |
| Rikenellaceae              | 3.006454         | 0.048181         | 0.016274 | 0.009219 | 0.020957        | 0.00893  | 6.488539         | 1.00127          | 0.022239 | 0.021942 | 0.042553        | 0.030852 | 3.146629         | 0.05508          | 5.978008 | 1.672287 | 0.030616        | 0.431151 |        |        |        |
| Christensenellaceae        | 0.226762         | 1.052277         | 0.192422 | 0.009988 | 0.401174        | 0.005953 | 0.18555          | 0.666865         | 0.34524  | 0.278971 | 1.744024        | 0.041136 | 1.647014         | 0.00216          | 0.022124 | 0.050436 | 0.03171         | 0.041724 |        |        |        |
| Helicobacteriaceae         | 0.004446         | 0.006745         | 0.005744 | 0.002305 | 0.009979        | 0.005953 | 0.000952         | 0.001944         | 0.005295 | 0.009404 | 0.003176        | 0.007999 | 0.012817         | 0.0054           | 0.005531 | 0.003956 | 0.002187        | 0.000818 |        |        |        |
| Peptostreptococcaceae      | 0.031865         | 0                | 0.000957 | 0.002305 | 0.002994        | 0.002977 | 0.035207         | 0.001944         | 0        | 0.003135 | 0.000635        | 0.002285 | 0.400538         | 0.00216          | 0.004425 | 0.001978 | 0.001093        | 0.003272 |        |        |        |
| Prevotellaceae             | 0.005187         | 0.002891         | 0        | 0.001537 | 0.002994        | 0.001984 | 0.027595         | 0.00324          | 0.002118 | 0        | 0.000635        | 0        | 0.003204         | 0                | 0.003319 | 0        | 0.006561        | 0.002454 |        |        |        |
| Verrucomicrobiaceae        | 0.002964         | 0.001927         | 0.001915 | 0.001537 | 0.001996        | 0.001984 | 0.002855         | 0.001944         | 0.002118 | 0        | 0               | 0.001143 | 0                | 0.00216          | 0        | 0.001978 | 0               | 0        |        |        |        |
| Oxalobacteraceae           | 0.000741         | 0                | 0.002872 | 0.001537 | 0.005988        | 0.001984 | 0.003806         | 0.003888         | 0.001059 | 0        | 0.006986        | 0.002285 | 0.009613         | 0                | 0.006637 | 0.003956 | 0.001093        | 0        |        |        |        |
| Odoribacteraceae           | 0.008152         | 0                | 0        | 0.001537 | 0.000998        | 0.000992 | 0.010467         | 0.000648         | 0        | 0.003135 | 0               | 0        | 0.006409         | 0                | 0        | 0        | 0               | 0.000818 |        |        |        |
| Deferribacteriaceae        | 0.000741         | 0.003854         | 0.001915 | 0.001537 | 0.001996        | 0.000992 | 0.001903         | 0                | 0.004236 | 0.003135 | 0.003176        | 0.002285 | 0                | 0.00432          | 0        | 0.004945 | 0.002187        | 0.001636 |        |        |        |
| Methanobacteriaceae        | 0                | 0.002891         | 0        | 0.000768 | 0.001996        | 0.000992 | 0                | 0.000648         | 0.002118 | 0        | 0.000635        | 0        | 0                | 0                | 0        | 0        | 0               | 0        |        |        |        |
| Bacillaceae                | 0                | 0.000964         | 0.000957 | 0.000768 | 0               | 0.000992 | 0.001903         | 0                | 0.003177 | 0        | 0.00127         | 0.065132 | 0                | 0.00432          | 0.003319 | 0        | 0.002187        | 0.006545 |        |        |        |
| Anaeroplasmataceae         | 0                | 0                | 0.001915 | 0        | 0               | 0.000992 | 0                | 0                | 0        | 0.003135 | 0               | 0        | 0                | 0                | 0        | 0.000989 | 0.001093        | 0.000818 |        |        |        |
| Enterococcaceae            | 0                | 0                | 0        | 0        | 0               | 0.000992 | 0.002855         | 0                | 0        | 0        | 0.000635        | 0.002285 | 0                | 0.02916          | 0.042036 | 0        | 0.029523        | 0.068722 |        |        |        |
| Victivallaceae             | 0.043722         | 0                | 0        | 0        | 0.000998        | 0        | 0.027595         | 0.000648         | 0.002118 | 0        | 0.00127         | 0        | 0.006409         | 0                | 0        | 0        | 0               | 0        |        |        |        |
| Peptococcaceae             | 0.001482         | 0.006745         | 0.006701 | 0.006915 | 0.000998        | 0        | 0.004758         | 0.003888         | 0.003177 | 0.006269 | 0.00127         | 0.007999 | 0.009613         | 0.0108           | 0        | 0.015823 | 0.005467        | 0.002454 |        |        |        |
| Corynebacteriaceae         | 0.001482         | 0                | 0        | 0        | 0               | 0        | 0                | 0                | 0        | 0        | 0               | 0        | 0                | 0.00216          | 0        | 0.031646 | 0               | 0        |        |        |        |
| Gracilibacteraceae         | 0.000741         | 0.002891         | 0        | 0.000768 | 0               | 0        | 0.001903         | 0.001296         | 0.001059 | 0        | 0.000635        | 0.001143 | 0                | 0.00108          | 0.001106 | 0.001978 | 0.001093        | 0.000818 |        |        |        |
| Rhodocyclaceae             | 0.000741         | 0                | 0        | 0        | 0               | 0        | 0                | 0                | 0.001059 | 0        | 0               | 0        | 0                | 0                | 0        | 0        | 0.001093        | 0        |        |        |        |
| Micrococcaceae             | 0                | 0.000964         | 0        | 0        | 0               | 0        | 0                | 0                | 0        | 0        | 0               | 0        | 0                | 0                | 0        | 0        | 0.008748        | 0.009817 |        |        |        |
| Burkholderiaceae           | 0                | 0                | 0.000957 | 0        | 0               | 0        | 0                | 0                | 0.002118 | 0        | 0.000635        | 0        | 0                | 0                | 0.001106 | 0        | 0.001093        | 0        |        |        |        |
| Pasteurellaceae            | 0                | 0                | 0.000957 | 0        | 0               | 0        | 0.000952         | 0                | 0        | 0        | 0               | 0        | 0                | 0.00108          | 0.001106 | 0        | 0               | 0        |        |        |        |
| Moraxellaceae              | 0                | 0                | 0.000957 | 0        | 0               | 0        | 0                | 0                | 0        | 0        | 0               | 0        | 0                | 0                | 0        | 0        | 0               | 0        |        |        |        |
| Brachyspiraceae            | 0                | 0                | 0.000957 | 0        | 0               | 0        | 0                | 0                | 0        | 0        | 0               | 0        | 0                | 0                | 0        | 0        | 0               | 0        |        |        |        |
| Streptococcaceae           | 0                | 0                | 0        | 0.000768 | 0.000998        | 0        | 0.001903         | 0.000648         | 0.001059 | 0        | 0.000635        | 0        | 0                | 0                | 0        | 0        | 0               | 0        |        |        |        |
| Thermoactinomycetaceae     | 0                | 0                | 0        | 0.000768 | 0               | 0        | 0                | 0                | 0        | 0        | 0               | 0        | 0                | 0                | 0        | 0        | 0               | 0        |        |        |        |
| Selenomonadaceae           | 0                | 0                | 0        | 0.000768 | 0               | 0        | 0.000952         | 0                | 0        | 0        | 0               | 0        | 0                | 0.00108          | 0        | 0        | 0               | 0        |        |        |        |
| Aerococcaceae              | 0                | 0                | 0        | 0        | 0.000998        | 0        | 0                | 0                | 0.001059 | 0        | 0               | 0        | 0                | 0                | 0        | 0        | 0               | 0        |        |        |        |
| Carnobacteriaceae          | 0                | 0                | 0        | 0        | 0               | 0        | 0                | 0                | 0        | 0        | 0               | 0        | 0                | 0                | 0        | 0        | 0               | 0.001636 |        |        |        |
| Planococcaceae             | 0                | 0                | 0        | 0        | 0               | 0        | 0                | 0.000648         | 0        | 0        | 0               | 0.002285 | 0                | 0                | 0        | 0        | 0               | 0        |        |        |        |
| Actinomycetaceae           | 0                | 0                | 0        | 0        | 0               | 0        | 0                | 0                | 0        | 0        | 0.00127         | 0.001143 | 0                | 0                | 0.001106 | 0        | 0               | 0        |        |        |        |
| Akkermansiaceae            | 0                | 0                | 0        | 0        | 0               | 0        | 0                | 0                | 0.001059 | 0        | 0               | 0        | 0                | 0.00324          | 0.002212 | 0        | 0               | 0        |        |        |        |
| Peptoniphilaceae           | 0                | 0                | 0        | 0        | 0               | 0        | 0                | 0                | 0        | 0        | 0               | 0        | 0                | 0                | 0        | 0        | 0               | 0.001636 |        |        |        |
| Caldicoprobacteraceae      | 0                | 0                | 0        | 0        | 0               | 0        | 0                | 0.000648         | 0        | 0        | 0               | 0        | 0                | 0                | 0        | 0        | 0.001093        | 0.000818 |        |        |        |
| Clostridiales Family XIII. |                  |                  |          |          |                 |          |                  |                  |          |          |                 |          |                  |                  |          |          |                 |          |        |        |        |
| Incertae Sedis             | 0                | 0                | 0        | 0        | 0               | 0        | 0                | 0                | 0        | 0        | 0               | 0        | 0.016022         | 0                | 0        | 0        | 0               | 0        |        |        |        |
| Brevibacteriaceae          | 0                | 0                | 0        | 0        | 0               | 0        | 0                | 0                | 0        | 0        | 0               | 0.001143 | 0                | 0                | 0        | 0        | 0               | 0        |        |        |        |
| Staphylococcaceae          | 0                | 0                | 0        | 0        | 0               | 0        | 0                | 0                | 0        | 0        | 0               | 0        | 0                | 0                | 0        | 0.000989 | 0               | 0        |        |        |        |
| Campylobacteraceae         | 0                | 0                | 0        | 0        | 0               | 0        | 0                | 0.000648         | 0        | 0        | 0               | 0        | 0                | 0                | 0        | 0        | 0               | 0        |        |        |        |
